# Supplementary material
Source: HighWire-hosted journal article supplement (http://www.ajevonline.org/highwire/filestream/10923/field_highwire_adjunct_files/0/Supplemental_Data.pdf)
Supplement: Supplemental_Data.pdf [file Supplemental_Data.pdf]

# Supplemental Data for:

Križanović S, Gracin L, Cindrić M, Tomašević M, Kelšin K, Lukić K and Kovačević Ganić K.

Comparison of proteomic, metabolic, and growth profiles of *Brettanomyces bruxellensis* isolates from Croatian wines.

Am J Enol Vitic 70:77-87. doi: 10.5344/ajev.2018.18025

**Supplemental Table 1** Percentage of matched proteins for *Brettanomyces bruxellensis* wine isolates.

| Isolate | Percentage of matched proteins |
|---------|--------------------------------|
| KLV11   | 2.01                           |
| KLV13   | 2.93                           |
| KLV14   | 2.91                           |
| KLV15   | 2.70                           |
| KLV16   | 2.58                           |
| KLV17   | 2.66                           |
| KLV18   | 2.87                           |
| KLV19   | 1.97                           |
| KLV21   | 2.60                           |
| KLV22   | 2.34                           |

**Supplemental Table 2** List of proteins expressed in the tested *Brettanomyces bruxellensis* isolates and the reference strain.

| Protein name                                                                             | NCBI accession number | No. of tested isolates expressing protein | Isolate  |        |        |        |        |        |        |        |        |        |        |
|------------------------------------------------------------------------------------------|-----------------------|-------------------------------------------|----------|--------|--------|--------|--------|--------|--------|--------|--------|--------|--------|
|                                                                                          |                       |                                           | CBS 2499 | KLV 11 | KLV 13 | KLV 14 | KLV 15 | KLV 16 | KLV 17 | KLV 18 | KLV 19 | KLV 21 | KLV 22 |
| hsp12p                                                                                   | 385303971             | 1                                         | nd       | nd     | nd     | nd     | nd     | nd     | nd     | nd     | d      | nd     | nd     |
| f-actin capping protein beta subunit                                                     | 385302592             | 1                                         | nd       | nd     | nd     | nd     | nd     | nd     | d      | nd     | nd     | nd     | nd     |
| mitochondrial translation initiation factor 2                                            | 385301624             | 1                                         | nd       | nd     | d      | nd     | nd     | nd     | nd     | nd     | nd     | nd     | nd     |
| eukaryotic peptide chain release factor GTP-binding subunit                              | 385302113             | 1                                         | nd       | d      | nd     | nd     | nd     | nd     | nd     | nd     | nd     | nd     | nd     |
| putative RNA Pol II ctd phosphatase component                                            | 385301990             | 1                                         | nd       | nd     | nd     | nd     | nd     | nd     | nd     | nd     | nd     | nd     | d      |
| hypothetical protein AWRI1499_0319                                                       | 385305789             | 1                                         | nd       | nd     | nd     | nd     | nd     | nd     | nd     | nd     | nd     | d      | nd     |
| guanine nucleotide exchange factor for adp ribosylation factors                          | 385304429             | 1                                         | nd       | nd     | nd     | nd     | d      | nd     | nd     | nd     | nd     | nd     | nd     |
| protein required for daughter cell multiple mitotic checkpoints and chromosome stability | 385303858             | 1                                         | nd       | nd     | d      | nd     | nd     | nd     | nd     | nd     | nd     | nd     | nd     |
| glutamyl-tRNA synthetase                                                                 | 385304182             | 1                                         | nd       | nd     | d      | nd     | nd     | nd     | nd     | nd     | nd     | nd     | nd     |
| s-adenosyl-l-methionine-dependent tRNA: m5c-methyltransferase                            | 385304670             | 1                                         | d        | nd     | nd     | nd     | nd     | nd     | nd     | nd     | nd     | nd     | nd     |
| maltase                                                                                  | 385301020             | 8                                         | d        | d      | d      | d      | d      | nd     | d      | d      | nd     | d      | nd     |
| sensor-transducer                                                                        | 385301335             | 2                                         | nd       | nd     | d      | nd     | d      | nd     | nd     | nd     | nd     | nd     | nd     |
| heat shock protein 104                                                                   | 385303591             | 1                                         | nd       | nd     | nd     | nd     | nd     | nd     | nd     | nd     | nd     | nd     | d      |
| pentafunctional arom polypeptide                                                         | 385305706             | 1                                         | nd       | nd     | nd     | nd     | nd     | nd     | nd     | nd     | nd     | nd     | d      |
| fructose-bisphosphate aldolase                                                           | 385302207             | 10                                        | d        | nd     | d      | d      | d      | d      | d      | d      | d      | d      | d      |
| gaa1p                                                                                    | 385303186             | 1                                         | nd       | nd     | nd     | nd     | nd     | nd     | nd     | nd     | nd     | nd     | d      |
| hypothetical protein AWRI1499_4120                                                       | 385301846             | 1                                         | nd       | nd     | nd     | nd     | d      | nd     | nd     | nd     | nd     | nd     | nd     |
| hypothetical protein AWRI1499_0594                                                       | 385305545             | 3                                         | nd       | nd     | d      | nd     | nd     | nd     | nd     | nd     | nd     | d      | d      |
| hypothetical protein AWRI1499_1931                                                       | 385304134             | 1                                         | nd       | nd     | nd     | nd     | nd     | nd     | nd     | nd     | nd     | nd     | d      |
| magnesium transporter                                                                    | 385304469             | 1                                         | nd       | nd     | d      | nd     | nd     | nd     | nd     | nd     | nd     | nd     | nd     |
| mitotic checkpoint protein bub3                                                          | 385301476             | 1                                         | nd       | nd     | d      | nd     | nd     | nd     | nd     | nd     | nd     | nd     | nd     |
| putative tRNA ribose methyltransferase                                                   | 385303949             | 2                                         | d        | nd     | nd     | nd     | d      | nd     | nd     | nd     | nd     | nd     | nd     |
| putative membrane protein ycr061w                                                        | 385301654             | 1                                         | nd       | nd     | nd     | nd     | nd     | nd     | nd     | d      | nd     | nd     | nd     |
| plasma membrane channel protein                                                          | 385303915             | 1                                         | nd       | nd     | d      | nd     | nd     | nd     | nd     | nd     | nd     | nd     | nd     |
| putative ribonuclease III                                                                | 385302377             | 1                                         | nd       | nd     | d      | nd     | nd     | nd     | nd     | nd     | nd     | nd     | nd     |

# Supplemental Data for:

Križanović S, Gracin L, Cindrić M, Tomašević M, Kelšin K, Lukić K and Kovačević Ganić K.

Comparison of proteomic, metabolic, and growth profiles of *Brettanomyces bruxellensis* isolates from Croatian wines.

Am J Enol Vitic 70:77-87. doi: 10.5344/ajev.2018.18025

**Supplemental Table 2 (continued)** List of proteins expressed in the tested *Brettanomyces bruxellensis* isolates and the reference strain.

| Protein name                                                                     | NCBI accession number | No. of tested isolates expressing protein | Isolate  |        |        |        |        |        |        |        |        |        |        |
|----------------------------------------------------------------------------------|-----------------------|-------------------------------------------|----------|--------|--------|--------|--------|--------|--------|--------|--------|--------|--------|
|                                                                                  |                       |                                           | CBS 2499 | KLV 11 | KLV 13 | KLV 14 | KLV 15 | KLV 16 | KLV 17 | KLV 18 | KLV 19 | KLV 21 | KLV 22 |
| hypothetical protein AWRI1499_1387                                               | 385304653             | 1                                         | nd       | nd     | d      | nd     | nd     | nd     | nd     | nd     | nd     | nd     | nd     |
| aur1p                                                                            | 385305005             | 1                                         | nd       | d      | nd     | nd     | nd     | nd     | nd     | nd     | nd     | nd     | nd     |
| ykl047w-like protein                                                             | 385303627             | 1                                         | nd       | nd     | nd     | nd     | nd     | nd     | nd     | nd     | nd     | nd     | d      |
| heat repeat protein                                                              | 385302447             | 1                                         | nd       | nd     | nd     | nd     | nd     | nd     | d      | nd     | nd     | nd     | nd     |
| r3h domain-containing protein                                                    | 385302604             | 1                                         | nd       | nd     | nd     | d      | nd     | nd     | nd     | nd     | nd     | nd     | nd     |
| DNA-dependent ATPase                                                             | 385302190             | 1                                         | nd       | nd     | nd     | nd     | nd     | nd     | d      | nd     | nd     | nd     | nd     |
| sorting nexin-41                                                                 | 385303173             | 1                                         | nd       | d      | nd     | nd     | nd     | nd     | nd     | nd     | nd     | nd     | nd     |
| hypothetical protein AWRI1499_0880                                               | 385305182             | 1                                         | nd       | nd     | d      | nd     | nd     | nd     | nd     | nd     | nd     | nd     | nd     |
| membrane bud-specific                                                            | 385301115             | 1                                         | nd       | nd     | nd     | d      | nd     | nd     | nd     | nd     | nd     | nd     | nd     |
| monothiol glutaredoxin-3                                                         | 385304490             | 1                                         | nd       | nd     | nd     | nd     | nd     | nd     | d      | nd     | nd     | nd     | nd     |
| putative spindle-pole body protein                                               | 385303287             | 5                                         | nd       | nd     | d      | d      | nd     | nd     | nd     | nd     | d      | d      | d      |
| chromo domain protein 1                                                          | 385305649             | 1                                         | nd       | nd     | nd     | nd     | nd     | nd     | nd     | nd     | nd     | nd     | d      |
| ATP-dependent DNA helicase mitochondrial precursor                               | 385302133             | 1                                         | nd       | nd     | nd     | nd     | nd     | nd     | nd     | nd     | nd     | d      | nd     |
| mitotic spindle midzone localized microtubule-associated protein family member   | 385305751             | 1                                         | nd       | nd     | nd     | nd     | nd     | d      | nd     | nd     | nd     | nd     | nd     |
| exocyst complex component                                                        | 385301107             | 2                                         | nd       | nd     | d      | nd     | nd     | nd     | nd     | nd     | nd     | d      | nd     |
| fungal-specific transcription factor                                             | 385301871             | 1                                         | nd       | nd     | nd     | d      | nd     | nd     | d      | nd     | nd     | nd     | nd     |
| yor296w-like protein                                                             | 385305613             | 1                                         | nd       | nd     | nd     | nd     | nd     | nd     | nd     | d      | nd     | nd     | nd     |
| glutathione s-transferase                                                        | 385302375             | 5                                         | nd       | nd     | nd     | d      | d      | nd     | d      | nd     | nd     | d      | d      |
| cytoskeleton assembly control protein                                            | 385300989             | 1                                         | nd       | nd     | nd     | d      | nd     | nd     | nd     | nd     | nd     | nd     | nd     |
| hypothetical protein AWRI1499_4602                                               | 385301345             | 3                                         | nd       | nd     | nd     | nd     | nd     | nd     | nd     | d      | d      | nd     | d      |
| structure-specific endonuclease rad27                                            | 385302733             | 1                                         | nd       | nd     | nd     | nd     | d      | nd     | nd     | nd     | nd     | nd     | nd     |
| DNA-dependent RNA polymerase i subunit a43                                       | 385305357             | 1                                         | nd       | nd     | nd     | nd     | d      | nd     | nd     | nd     | nd     | nd     | nd     |
| hypothetical protein AWRI1499_3365                                               | 385302631             | 1                                         | nd       | nd     | nd     | nd     | nd     | nd     | d      | nd     | nd     | nd     | nd     |
| glutathione transferase 3                                                        | 385301484             | 3                                         | nd       | nd     | nd     | nd     | d      | nd     | nd     | d      | nd     | d      | nd     |
| serine/threonine protein kinase                                                  | 385303362             | 2                                         | nd       | nd     | nd     | nd     | nd     | d      | d      | nd     | nd     | nd     | nd     |
| cell division control protein 48                                                 | 385301949             | 2                                         | nd       | d      | nd     | d      | nd     | nd     | nd     | nd     | nd     | nd     | nd     |
| eukaryotic translation initiation factor                                         | 385301806             | 1                                         | nd       | nd     | nd     | nd     | nd     | nd     | d      | nd     | nd     | nd     | nd     |
| hypothetical protein AWRI1499_0838                                               | 385305237             | 1                                         | nd       | nd     | nd     | d      | nd     | nd     | nd     | nd     | nd     | nd     | nd     |
| histone acetyltransferase type b subunit 2                                       | 385302065             | 1                                         | nd       | nd     | nd     | nd     | nd     | nd     | nd     | d      | nd     | nd     | nd     |
| karyogamy protein kar4                                                           | 385302971             | 1                                         | nd       | nd     | d      | nd     | nd     | nd     | nd     | nd     | nd     | nd     | nd     |
| nuclear architecture related protein                                             | 385306039             | 2                                         | nd       | nd     | d      | d      | nd     | nd     | nd     | nd     | nd     | nd     | nd     |
| uba ts-n domain protein                                                          | 385305793             | 1                                         | nd       | nd     | d      | nd     | nd     | nd     | nd     | nd     | nd     | nd     | nd     |
| protein phosphatase regulatory subunit                                           | 385305574             | 2                                         | d        | nd     | nd     | nd     | nd     | nd     | nd     | nd     | nd     | nd     | d      |
| alpha-glucoside permease                                                         | 385301224             | 1                                         | nd       | nd     | nd     | nd     | nd     | d      | nd     | nd     | nd     | nd     | nd     |
| coatome beta subunit                                                             | 385304212             | 1                                         | nd       | nd     | nd     | nd     | d      | nd     | nd     | nd     | nd     | nd     | nd     |
| subunit of the RNA polymerase II mediator                                        | 385303123             | 1                                         | nd       | nd     | d      | nd     | nd     | nd     | nd     | nd     | nd     | nd     | nd     |
| cytosolic regulator pianissimo                                                   | 385302615             | 1                                         | nd       | nd     | nd     | nd     | nd     | nd     | nd     | nd     | nd     | d      | nd     |
| hypothetical protein AWRI1499_1427                                               | 385304634             | 1                                         | nd       | nd     | nd     | nd     | nd     | nd     | nd     | nd     | d      | nd     | nd     |
| transmembrane GTPase fzo1                                                        | 385301672             | 1                                         | nd       | nd     | nd     | nd     | nd     | nd     | nd     | nd     | nd     | nd     | d      |
| constituent of 66s pre-ribosomal required for large ribosomal subunit biogenesis | 385304601             | 2                                         | nd       | nd     | nd     | nd     | d      | nd     | nd     | d      | nd     | nd     | nd     |
| peptidyl-prolyl cis-trans isomerase                                              | 385305007             | 11                                        | d        | d      | d      | d      | d      | d      | d      | d      | d      | d      | d      |
| putative methyltransferase                                                       | 385305663             | 2                                         | nd       | nd     | nd     | d      | nd     | d      | nd     | nd     | nd     | nd     | nd     |
| ribosome biogenesis protein tsr1                                                 | 385302915             | 1                                         | nd       | nd     | nd     | nd     | nd     | d      | nd     | nd     | nd     | nd     | nd     |

# Supplemental Data for:

Križanović S, Gracin L, Cindrić M, Tomašević M, Kelšin K, Lukić K and Kovačević Ganić K.

Comparison of proteomic, metabolic, and growth profiles of *Brettanomyces bruxellensis* isolates from Croatian wines.

Am J Enol Vitic 70:77-87. doi: 10.5344/ajev.2018.18025

**Supplemental Table 2 (continued)** List of proteins expressed in the tested *Brettanomyces bruxellensis* isolates and the reference strain.

| Protein name                                                                   | NCBI accession number | No. of tested isolates expressing protein | Isolate  |        |        |        |        |        |        |        |        |        |        |
|--------------------------------------------------------------------------------|-----------------------|-------------------------------------------|----------|--------|--------|--------|--------|--------|--------|--------|--------|--------|--------|
|                                                                                |                       |                                           | CBS 2499 | KLV 11 | KLV 13 | KLV 14 | KLV 15 | KLV 16 | KLV 17 | KLV 18 | KLV 19 | KLV 21 | KLV 22 |
| putative wry family protein 8                                                  | 385304152             | 1                                         | nd       | nd     | nd     | nd     | nd     | nd     | nd     | nd     | d      | nd     | nd     |
| plasma membrane snare protein                                                  | 385301930             | 1                                         | nd       | nd     | nd     | d      | nd     | nd     | nd     | nd     | nd     | nd     | nd     |
| ubiquitin-protein ligase                                                       | 385304568             | 1                                         | nd       | nd     | d      | nd     | nd     | nd     | nd     | nd     | nd     | nd     | nd     |
| aspartyl-tRNA synthetase                                                       | 385301707             | 1                                         | nd       | d      | nd     | nd     | nd     | nd     | nd     | nd     | nd     | nd     | nd     |
| ynl313c-like protein                                                           | 385301772             | 1                                         | nd       | nd     | nd     | nd     | nd     | nd     | nd     | nd     | nd     | d      | nd     |
| hypothetical protein AWRI1499_2101                                             | 385303941             | 1                                         | nd       | nd     | nd     | d      | nd     | nd     | nd     | nd     | nd     | nd     | nd     |
| mannosyl kinase                                                                | 385304273             | 1                                         | nd       | nd     | d      | nd     | nd     | nd     | nd     | nd     | nd     | nd     | nd     |
| hypothetical protein AWRI1499_0001                                             | 385306091             | 1                                         | nd       | nd     | nd     | nd     | nd     | nd     | nd     | nd     | d      | nd     | nd     |
| sulfate permease 1                                                             | 385302217             | 1                                         | nd       | nd     | nd     | nd     | nd     | nd     | nd     | nd     | nd     | nd     | d      |
| spt3 dosage dependent suppressor of ty-induced promoter mutations-like protein | 385303738             | 1                                         | nd       | nd     | nd     | d      | nd     | nd     | nd     | nd     | nd     | nd     | nd     |
| DNA repair                                                                     | 385306096             | 1                                         | nd       | nd     | nd     | d      | nd     | nd     | nd     | nd     | nd     | nd     | nd     |
| putative mitochondrial protein fmp35                                           | 385305790             | 1                                         | d        | nd     | nd     | nd     | nd     | nd     | nd     | nd     | nd     | nd     | nd     |
| monocarboxylate transporter                                                    | 385303743             | 3                                         | d        | nd     | nd     | nd     | nd     | nd     | nd     | d      | nd     | d      | nd     |
| c6 transcription factor                                                        | 385305969             | 2                                         | d        | nd     | nd     | nd     | nd     | nd     | nd     | nd     | nd     | d      | nd     |
| Na(+) H(+) antiporter                                                          | 385305887             | 1                                         | nd       | nd     | nd     | nd     | nd     | nd     | nd     | nd     | nd     | nd     | d      |
| proteinase inhibitor i2b                                                       | 385303424             | 7                                         | d        | d      | d      | nd     | d      | d      | nd     | nd     | d      | d      | nd     |
| c6 transcription                                                               | 385302415             | 2                                         | nd       | d      | nd     | nd     | d      | nd     | nd     | nd     | nd     | nd     | nd     |
| 60s ribosomal protein l23                                                      | 385305581             | 1                                         | nd       | nd     | nd     | nd     | nd     | nd     | d      | nd     | nd     | nd     | nd     |
| 5 -3 exoribonuclease 2                                                         | 385303464             | 1                                         | nd       | nd     | nd     | nd     | d      | nd     | nd     | nd     | nd     | nd     | nd     |
| hypothetical protein AWRI1499_1635                                             | 385304394             | 2                                         | nd       | nd     | nd     | d      | d      | nd     | nd     | nd     | nd     | nd     | nd     |
| d-arabinose dehydrogenase                                                      | 385303665             | 1                                         | nd       | nd     | nd     | nd     | d      | nd     | nd     | nd     | nd     | nd     | nd     |
| component of the exomer which also contains and bud7p                          | 385304983             | 1                                         | nd       | nd     | nd     | nd     | d      | nd     | nd     | nd     | nd     | nd     | nd     |
| hypothetical protein AWRI1499_2191                                             | 385303790             | 1                                         | nd       | nd     | d      | nd     | nd     | nd     | nd     | nd     | nd     | nd     | nd     |
| anthranilate phosphoribosyltransferase                                         | 385303571             | 1                                         | nd       | nd     | nd     | nd     | nd     | nd     | nd     | nd     | nd     | d      | nd     |
| 60s ribosomal protein l20                                                      | 385301142             | 8                                         | d        | d      | d      | d      | nd     | d      | d      | d      | nd     | d      | nd     |
| acetyl-coenzyme a synthetase 2                                                 | 385301373             | 1                                         | nd       | nd     | nd     | nd     | nd     | nd     | d      | nd     | nd     | nd     | nd     |
| enolase                                                                        | 385302461             | 11                                        | d        | d      | d      | d      | d      | d      | d      | d      | d      | d      | d      |
| 60s ribosomal protein l19                                                      | 385304597             | 2                                         | nd       | d      | nd     | nd     | d      | nd     | nd     | nd     | nd     | nd     | nd     |
| TFIIF (transcription factor II) largest subunit                                | 385304564             | 1                                         | nd       | nd     | nd     | nd     | d      | nd     | nd     | nd     | nd     | nd     | nd     |
| subunit of the nuclear pore complex                                            | 385303143             | 3                                         | nd       | nd     | nd     | nd     | d      | nd     | nd     | nd     | nd     | nd     | d      |
| glycolipid-anchored surface protein 4 precursor                                | 385305754             | 1                                         | nd       | nd     | nd     | nd     | nd     | nd     | nd     | nd     | nd     | d      | nd     |
| putative rRNA methyltransferase                                                | 385305060             | 1                                         | nd       | nd     | nd     | nd     | nd     | nd     | d      | nd     | nd     | nd     | nd     |
| elongation factor 1-alpha                                                      | 385304523             | 11                                        | d        | d      | d      | d      | d      | d      | d      | d      | d      | d      | d      |
| nicotinamide-nucleotide adenyltransferase 1                                    | 385303103             | 1                                         | nd       | nd     | nd     | d      | nd     | nd     | nd     | nd     | nd     | nd     | nd     |
| c2h2 zinc finger protein                                                       | 385304402             | 1                                         | nd       | nd     | nd     | nd     | d      | nd     | nd     | nd     | nd     | nd     | nd     |
| allantoate permease                                                            | 385304765             | 1                                         | nd       | d      | nd     | nd     | nd     | nd     | nd     | nd     | nd     | nd     | nd     |
| vhs domain protein                                                             | 385303491             | 1                                         | nd       | nd     | nd     | nd     | nd     | d      | nd     | nd     | nd     | nd     | nd     |
| serine threonine-protein kinase cbk1                                           | 385305607             | 1                                         | nd       | nd     | nd     | nd     | nd     | nd     | nd     | nd     | nd     | nd     | d      |
| hypothetical protein AWRI1499_3262                                             | 385302729             | 1                                         | nd       | nd     | nd     | nd     | nd     | nd     | nd     | nd     | nd     | nd     | d      |
| 40s ribosomal protein s8                                                       | 385306033             | 1                                         | nd       | nd     | nd     | nd     | nd     | nd     | nd     | d      | nd     | nd     | nd     |
| drug resistance protein 2                                                      | 385301404             | 2                                         | nd       | nd     | nd     | d      | nd     | nd     | nd     | nd     | nd     | d      | nd     |
| histone h2a                                                                    | 385302641             | 2                                         | nd       | nd     | nd     | nd     | d      | nd     | nd     | d      | nd     | nd     | nd     |
| ring-8 protein                                                                 | 385305599             | 1                                         | nd       | nd     | nd     | nd     | nd     | nd     | nd     | nd     | nd     | d      | nd     |
| mitochondrial RNA polymerase                                                   | 385304972             | 1                                         | nd       | nd     | nd     | nd     | nd     | nd     | nd     | d      | nd     | nd     | nd     |

# Supplemental Data for:

Križanović S, Gracin L, Cindrić M, Tomašević M, Kelšin K, Lukić K and Kovačević Ganić K.

Comparison of proteomic, metabolic, and growth profiles of *Brettanomyces bruxellensis* isolates from Croatian wines.

Am J Enol Vitic 70:77-87. doi: 10.5344/ajev.2018.18025

**Supplemental Table 2 (continued)** List of proteins expressed in the tested *Brettanomyces bruxellensis* isolates and the reference strain.

| Protein name                                         | NCBI accession number | No. of tested isolates expressing protein | Isolate  |        |        |        |        |        |        |        |        |        |        |
|------------------------------------------------------|-----------------------|-------------------------------------------|----------|--------|--------|--------|--------|--------|--------|--------|--------|--------|--------|
|                                                      |                       |                                           | CBS 2499 | KLV 11 | KLV 13 | KLV 14 | KLV 15 | KLV 16 | KLV 17 | KLV 18 | KLV 19 | KLV 21 | KLV 22 |
| ubiquitin carboxyl-terminal hydrolase                | 385303805             | 1                                         | nd       | nd     | nd     | nd     | nd     | nd     | d      | nd     | nd     | nd     | nd     |
| ymr185w-like protein                                 | 385303265             | 1                                         | d        | nd     | nd     | nd     | nd     | nd     | nd     | nd     | nd     | nd     | nd     |
| ygr235c-like protein                                 | 385301171             | 2                                         | nd       | nd     | nd     | nd     | nd     | nd     | nd     | d      | d      | nd     | nd     |
| 40s ribosomal protein s0                             | 385304377             | 5                                         | d        | nd     | nd     | d      | nd     | d      | d      | d      | nd     | nd     | nd     |
| n-terminal acetyltransferase complex ard1 subunit    | 385305730             | 1                                         | nd       | nd     | d      | nd     | nd     | nd     | nd     | nd     | nd     | nd     | nd     |
| hypothetical protein AWRI1499_1709                   | 385304320             | 1                                         | nd       | nd     | nd     | nd     | nd     | nd     | nd     | nd     | d      | nd     | nd     |
| vacuole morphology and inheritance protein 14        | 385302913             | 1                                         | nd       | nd     | d      | nd     | nd     | nd     | nd     | nd     | nd     | nd     | nd     |
| hemolysin-like protein                               | 385301041             | 1                                         | nd       | nd     | d      | nd     | nd     | nd     | nd     | nd     | nd     | nd     | nd     |
| mrps5p                                               | 385305503             | 1                                         | nd       | nd     | nd     | nd     | nd     | nd     | d      | nd     | nd     | nd     | nd     |
| putative negative regulator of exit from mitosis     | 385303859             | 2                                         | nd       | nd     | d      | d      | nd     | nd     | nd     | nd     | nd     | nd     | nd     |
| microtubule-associated protein                       | 385303189             | 2                                         | nd       | d      | nd     | nd     | nd     | nd     | d      | nd     | nd     | nd     | nd     |
| fatty acid synthase alpha subunit, partial           | 385303962             | 1                                         | nd       | nd     | nd     | nd     | nd     | nd     | nd     | nd     | nd     | nd     | d      |
| protein gis3                                         | 385301913             | 1                                         | nd       | nd     | nd     | nd     | d      | nd     | nd     | nd     | nd     | nd     | nd     |
| DNA topoisomerase II                                 | 385301380             | 1                                         | nd       | nd     | nd     | nd     | nd     | nd     | nd     | nd     | nd     | nd     | d      |
| multidrug-resistance transporte                      | 385300922             | 2                                         | nd       | nd     | nd     | nd     | nd     | nd     | nd     | d      | nd     | nd     | d      |
| hypothetical protein AWRI1499_4061                   | 385301937             | 1                                         | nd       | nd     | nd     | d      | nd     | nd     | nd     | nd     | nd     | nd     | nd     |
| putative zinc-regulated protein                      | 385302715             | 1                                         | nd       | nd     | nd     | d      | nd     | nd     | nd     | nd     | nd     | nd     | nd     |
| rho GTPase activator                                 | 385303037             | 1                                         | nd       | d      | nd     | nd     | nd     | nd     | nd     | nd     | nd     | nd     | nd     |
| telomere length regulation protein                   | 385304557             | 1                                         | d        | nd     | nd     | nd     | nd     | nd     | nd     | nd     | nd     | nd     | nd     |
| DNA-directed DNA polymerase catalytic subunit a      | 385301907             | 1                                         | nd       | nd     | nd     | nd     | nd     | d      | nd     | nd     | nd     | nd     | nd     |
| 60s ribosomal protein l16-a                          | 385302101             | 2                                         | nd       | nd     | nd     | nd     | d      | nd     | nd     | d      | nd     | nd     | nd     |
| putative cytosolic ribosomal protein l17             | 385302598             | 2                                         | nd       | nd     | d      | nd     | nd     | d      | nd     | nd     | nd     | nd     | nd     |
| putative phosphatidylinositol kinase                 | 385305582             | 1                                         | nd       | nd     | nd     | nd     | nd     | nd     | nd     | nd     | nd     | d      | nd     |
| auxilin-like protein involved in vesicular transport | 385305794             | 1                                         | nd       | nd     | nd     | nd     | nd     | nd     | nd     | d      | nd     | nd     | nd     |
| subunit of the hir a nucleosome assembly complex     | 385304647             | 1                                         | nd       | nd     | nd     | d      | nd     | nd     | nd     | nd     | nd     | nd     | nd     |
| hypothetical protein AWRI1499_1951                   | 385304103             | 2                                         | nd       | nd     | nd     | nd     | d      | nd     | nd     | d      | nd     | nd     | nd     |
| hansenula yellow enzyme 3                            | 385302160             | 1                                         | nd       | nd     | nd     | nd     | d      | nd     | nd     | nd     | nd     | nd     | nd     |
| negative regulator of transcription                  | 385301967             | 1                                         | nd       | nd     | nd     | d      | nd     | nd     | nd     | nd     | nd     | nd     | nd     |
| pab-dependent poly -specific ribonuclease subunit    | 385302127             | 1                                         | nd       | nd     | nd     | nd     | nd     | nd     | nd     | nd     | d      | nd     | nd     |
| putative RNA Pol II transcriptional activator        | 385303225             | 1                                         | nd       | nd     | nd     | nd     | nd     | nd     | nd     | nd     | nd     | d      | nd     |
| NADPH-cytochrome p450 reductase                      | 385301646             | 2                                         | nd       | nd     | nd     | d      | nd     | nd     | nd     | nd     | d      | nd     | nd     |
| glycosyl hydrolase                                   | 385302469             | 1                                         | nd       | nd     | nd     | nd     | nd     | nd     | nd     | d      | nd     | nd     | nd     |
| cdc19                                                | 385304821             | 3                                         | nd       | nd     | d      | d      | d      | nd     | nd     | nd     | nd     | nd     | nd     |
| cell cycle regulatory protein                        | 385301005             | 1                                         | nd       | nd     | nd     | nd     | nd     | nd     | nd     | d      | nd     | nd     | nd     |
| 10 kDa heat shock mitochondrial                      | 385305728             | 1                                         | nd       | nd     | nd     | nd     | nd     | nd     | nd     | d      | nd     | nd     | nd     |
| 40s ribosomal protein                                | 385301493             | 2                                         | nd       | nd     | nd     | nd     | nd     | d      | nd     | nd     | nd     | d      | nd     |
| ell complex subunit                                  | 385302474             | 2                                         | nd       | nd     | nd     | nd     | nd     | nd     | nd     | nd     | d      | nd     | d      |
| e3 ubiquitin ligase for rad6p                        | 385302794             | 1                                         | nd       | nd     | nd     | nd     | nd     | d      | nd     | nd     | nd     | nd     | nd     |
| drap deaminase                                       | 385304786             | 1                                         | nd       | nd     | nd     | nd     | nd     | d      | nd     | nd     | nd     | nd     | nd     |
| calcium-transporting ATPase 1                        | 385305561             | 2                                         | nd       | nd     | nd     | nd     | nd     | nd     | d      | nd     | nd     | nd     | d      |
| beta-tubulin cofactor d                              | 385305662             | 1                                         | nd       | nd     | nd     | nd     | nd     | nd     | d      | nd     | nd     | nd     | nd     |
| dynein-related aaa-type                              | 385304366             | 1                                         | nd       | nd     | nd     | d      | nd     | nd     | nd     | nd     | nd     | nd     | nd     |

# Supplemental Data for:

Križanović S, Gracin L, Cindrić M, Tomašević M, Kelšin K, Lukić K and Kovačević Ganić K.

Comparison of proteomic, metabolic, and growth profiles of *Brettanomyces bruxellensis* isolates from Croatian wines.

Am J Enol Vitic 70:77-87. doi: 10.5344/ajev.2018.18025

**Supplemental Table 2 (continued)** List of proteins expressed in the tested *Brettanomyces bruxellensis* isolates and the reference strain.

| Protein name                                                               | NCBI accession number | No. of tested isolates expressing protein | Isolate  |        |        |        |        |        |        |        |        |        |        |
|----------------------------------------------------------------------------|-----------------------|-------------------------------------------|----------|--------|--------|--------|--------|--------|--------|--------|--------|--------|--------|
|                                                                            |                       |                                           | CBS 2499 | KLV 11 | KLV 13 | KLV 14 | KLV 15 | KLV 16 | KLV 17 | KLV 18 | KLV 19 | KLV 21 | KLV 22 |
| 40s ribosomal protein s21                                                  | 385304325             | 3                                         | d        | nd     | d      | d      | nd     | nd     | nd     | nd     | nd     | nd     | nd     |
| urea amidolyase                                                            | 385302790             | 1                                         | nd       | nd     | nd     | nd     | nd     | nd     | nd     | d      | nd     | nd     | nd     |
| aspartate transcarbamylase                                                 | 385301480             | 1                                         | nd       | nd     | nd     | nd     | nd     | nd     | nd     | nd     | nd     | nd     | d      |
| GDP/GTP exchange factor                                                    | 385302427             | 7                                         | d        | d      | nd     | nd     | nd     | d      | d      | nd     | d      | d      | d      |
| avo2p                                                                      | 385304941             | 1                                         | nd       | d      | nd     | nd     | nd     | nd     | nd     | nd     | nd     | nd     | nd     |
| nusm subunit of mitochondrial NADH:ubiquinone oxidoreductase (complex I)   | 385304513             | 1                                         | nd       | nd     | d      | nd     | nd     | nd     | nd     | nd     | nd     | nd     | nd     |
| succinyl- ligase alpha- mitochondrial precursor                            | 385305760             | 1                                         | nd       | nd     | nd     | nd     | d      | nd     | nd     | nd     | nd     | nd     | nd     |
| transcriptional activator hap3                                             | 385301619             | 1                                         | nd       | nd     | d      | nd     | nd     | nd     | nd     | nd     | nd     | nd     | nd     |
| ATP-dependent protease                                                     | 385304188             | 1                                         | nd       | nd     | nd     | nd     | nd     | nd     | d      | nd     | nd     | nd     | nd     |
| glycoside hydrolase family 3                                               | 385304130             | 2                                         | nd       | nd     | nd     | nd     | nd     | d      | nd     | nd     | nd     | nd     | d      |
| phosphatidylinositol 3-kinase Pdd1p                                        | 385304203             | 1                                         | nd       | nd     | nd     | nd     | nd     | nd     | d      | nd     | nd     | nd     | nd     |
| putative mitochondrial seryl-tRNA synthetase                               | 385305314             | 3                                         | d        | nd     | d      | d      | nd     | nd     | nd     | nd     | nd     | nd     | nd     |
| member of the s family (chs5p-arf1p-binding proteins: chs6p) that forms th | 385302292             | 2                                         | nd       | nd     | d      | nd     | d      | nd     | nd     | nd     | nd     | nd     | nd     |
| mitochondrial precursor                                                    | 385304110             | 1                                         | d        | nd     | nd     | nd     | nd     | nd     | nd     | nd     | nd     | nd     | nd     |
| myb DNA-binding domain containing protein                                  | 385303360             | 1                                         | nd       | nd     | nd     | nd     | nd     | nd     | nd     | nd     | nd     | d      | nd     |
| myosin-2                                                                   | 385302429             | 2                                         | nd       | nd     | nd     | nd     | nd     | nd     | d      | nd     | nd     | d      | nd     |
| metalloprotease ATP23                                                      | 385305158             | 1                                         | nd       | nd     | nd     | d      | nd     | nd     | nd     | nd     | nd     | nd     | nd     |
| putative 26s proteasome regulatory particle subunit rpn13p                 | 385305765             | 1                                         | nd       | d      | nd     | nd     | nd     | nd     | nd     | nd     | nd     | nd     | nd     |
| ribonucleoside-diphosphate reductase large chain 1                         | 385303449             | 2                                         | nd       | nd     | nd     | nd     | nd     | nd     | nd     | d      | d      | nd     | nd     |
| DNA repair protein rad18                                                   | 385303815             | 1                                         | nd       | nd     | nd     | d      | nd     | nd     | nd     | nd     | nd     | nd     | nd     |
| putative forkhead-like transcriptional regulator                           | 385301738             | 2                                         | nd       | nd     | nd     | nd     | nd     | d      | nd     | nd     | nd     | d      | nd     |
| activator of forkhead-like transcription factor                            | 385302042             | 1                                         | nd       | nd     | nd     | nd     | nd     | nd     | nd     | nd     | nd     | d      | nd     |
| hypothetical protein AWRI1499_1886                                         | 385304159             | 2                                         | nd       | nd     | nd     | d      | nd     | nd     | nd     | nd     | nd     | d      | nd     |
| phosphoribosylformylglycinamide synthase                                   | 385301313             | 1                                         | nd       | nd     | nd     | nd     | d      | nd     | nd     | nd     | nd     | nd     | nd     |
| g-protein beta subunit-like protein containing wd repeats                  | 385302936             | 1                                         | nd       | nd     | nd     | nd     | d      | nd     | nd     | nd     | nd     | nd     | nd     |
| telomere elongation protein                                                | 385304340             | 1                                         | nd       | nd     | nd     | d      | nd     | nd     | nd     | nd     | nd     | nd     | nd     |
| 54s ribosomal protein mitochondrial                                        | 385301724             | 3                                         | nd       | d      | nd     | nd     | d      | nd     | d      | nd     | nd     | nd     | nd     |
| DNA polymerase alpha catalytic subunit                                     | 385304086             | 1                                         | d        | nd     | nd     | nd     | nd     | nd     | nd     | nd     | nd     | nd     | nd     |
| NADH-ubiquinone oxidoreductase                                             | 385302527             | 1                                         | nd       | nd     | nd     | nd     | nd     | nd     | nd     | nd     | nd     | nd     | d      |
| hypothetical protein AWRI1499_0767                                         | 385305288             | 1                                         | nd       | nd     | nd     | nd     | nd     | nd     | nd     | nd     | nd     | nd     | d      |
| ammonium transporter                                                       | 385304699             | 1                                         | nd       | nd     | d      | nd     | nd     | nd     | nd     | nd     | nd     | nd     | nd     |
| DNA replication                                                            | 385301163             | 2                                         | nd       | nd     | nd     | nd     | nd     | d      | nd     | nd     | nd     | nd     | d      |
| DNA replication complex gins protein sld5                                  | 385302608             | 1                                         | nd       | nd     | nd     | nd     | nd     | nd     | nd     | d      | nd     | nd     | nd     |
| btb poz domain-containing protein                                          | 385300955             | 1                                         | nd       | nd     | nd     | nd     | nd     | nd     | nd     | nd     | nd     | d      | nd     |
| wd repeat-containing protein                                               | 385302166             | 1                                         | nd       | nd     | nd     | nd     | nd     | d      | nd     | nd     | nd     | nd     | nd     |
| erv46p                                                                     | 385302035             | 1                                         | nd       | nd     | nd     | nd     | nd     | nd     | nd     | nd     | nd     | d      | nd     |
| yjr054w-like protein                                                       | 385305668             | 1                                         | nd       | d      | nd     | nd     | nd     | nd     | nd     | nd     | nd     | nd     | nd     |
| RNA binding protein                                                        | 385301297             | 1                                         | nd       | nd     | nd     | nd     | nd     | nd     | nd     | nd     | d      | nd     | nd     |
| retrograde regulation protein 2                                            | 385301258             | 1                                         | nd       | nd     | nd     | d      | nd     | nd     | nd     | nd     | nd     | nd     | nd     |

# Supplemental Data for:

Križanović S, Gracin L, Cindrić M, Tomašević M, Kelšin K, Lukić K and Kovačević Ganić K.

Comparison of proteomic, metabolic, and growth profiles of *Brettanomyces bruxellensis* isolates from Croatian wines.

Am J Enol Vitic 70:77-87. doi: 10.5344/ajev.2018.18025

**Supplemental Table 2 (continued)** List of proteins expressed in the tested *Brettanomyces bruxellensis* isolates and the reference strain.

| Protein name                                                                                      | NCBI accession number | No. of tested isolates expressing protein | Isolate  |        |        |        |        |        |        |        |        |        |        |
|---------------------------------------------------------------------------------------------------|-----------------------|-------------------------------------------|----------|--------|--------|--------|--------|--------|--------|--------|--------|--------|--------|
|                                                                                                   |                       |                                           | CBS 2499 | KLV 11 | KLV 13 | KLV 14 | KLV 15 | KLV 16 | KLV 17 | KLV 18 | KLV 19 | KLV 21 | KLV 22 |
| adenylate cyclase                                                                                 | 385303810             | 1                                         | d        | nd     | nd     | nd     | nd     | nd     | nd     | nd     | nd     | nd     | nd     |
| lap3p                                                                                             | 385302356             | 5                                         | nd       | nd     | nd     | nd     | d      | d      | d      | d      | nd     | nd     | d      |
| hypothetical protein AWRI1499_3646                                                                | 385302312             | 1                                         | nd       | nd     | nd     | nd     | nd     | nd     | nd     | d      | nd     | nd     | nd     |
| tkl1p                                                                                             | 385305456             | 3                                         | nd       | nd     | d      | d      | nd     | nd     | nd     | d      | nd     | nd     | nd     |
| cation translocating p-type ATPase                                                                | 385303821             | 2                                         | nd       | nd     | nd     | nd     | d      | nd     | nd     | nd     | d      | nd     | nd     |
| glycogen debranching enzyme                                                                       | 385304593             | 1                                         | nd       | nd     | nd     | nd     | nd     | nd     | nd     | nd     | nd     | nd     | d      |
| nma111                                                                                            | 385305979             | 1                                         | nd       | nd     | nd     | nd     | nd     | nd     | d      | nd     | nd     | nd     | nd     |
| nuclear localization sequence binding protein                                                     | 385305287             | 1                                         | nd       | nd     | d      | nd     | nd     | nd     | nd     | nd     | nd     | nd     | nd     |
| putative ser thr protein kinase                                                                   | 385302336             | 1                                         | nd       | nd     | nd     | nd     | nd     | nd     | nd     | d      | nd     | nd     | nd     |
| subunit c of the eight-subunit v1 peripheral membrane domain of vacuolar h+-ATPase (v-ATPase)     | 385305030             | 1                                         | d        | nd     | nd     | nd     | nd     | nd     | nd     | nd     | nd     | nd     | nd     |
| glycine mitochondrial precursor                                                                   | 385301927             | 1                                         | nd       | nd     | d      | nd     | nd     | nd     | nd     | nd     | nd     | nd     | nd     |
| ubiquitin                                                                                         | 385302811             | 11                                        | d        | d      | d      | d      | d      | d      | d      | d      | d      | d      | d      |
| glucan -beta-glucosidase precursor                                                                | 385305207             | 1                                         | nd       | nd     | nd     | d      | nd     | nd     | nd     | nd     | nd     | nd     | nd     |
| putative bud neck localizing protein phosphatase subunit bni4p                                    | 385305260             | 2                                         | nd       | nd     | nd     | d      | nd     | nd     | nd     | nd     | d      | nd     | nd     |
| pop1p                                                                                             | 385305564             | 1                                         | nd       | nd     | nd     | nd     | nd     | nd     | nd     | nd     | d      | nd     | nd     |
| mitochondrial distribution and morphology protein 31                                              | 385304913             | 1                                         | nd       | nd     | nd     | nd     | nd     | nd     | nd     | nd     | nd     | d      | nd     |
| serine threonine kinase                                                                           | 385301388             | 1                                         | nd       | nd     | d      | nd     | nd     | nd     | nd     | nd     | nd     | nd     | nd     |
| vacuolar h+-ATPase assembly protein                                                               | 385303547             | 1                                         | nd       | nd     | nd     | nd     | nd     | nd     | d      | nd     | nd     | nd     | nd     |
| protein involved in plasmid respiration and cell proliferation                                    | 385304457             | 2                                         | nd       | nd     | nd     | d      | nd     | nd     | d      | nd     | nd     | nd     | nd     |
| heat shock protein ssb1                                                                           | 385303397             | 11                                        | d        | d      | d      | d      | d      | d      | d      | d      | d      | d      | d      |
| hexameric DNA polymerase alpha-associated DNA helicase a involved in lagging strand DNA synthesis | 385304861             | 1                                         | nd       | d      | nd     | nd     | nd     | nd     | nd     | nd     | nd     | nd     | nd     |
| para-hydroxybenzoate-- mitochondrial precursor                                                    | 385304148             | 1                                         | nd       | nd     | nd     | nd     | nd     | nd     | nd     | nd     | nd     | d      | nd     |
| putative nucleolar complex protein 14                                                             | 385304802             | 1                                         | nd       | nd     | nd     | nd     | nd     | nd     | nd     | nd     | nd     | d      | nd     |
| ATP binding cassette transporter ABC1p                                                            | 385301761             | 1                                         | nd       | d      | nd     | nd     | nd     | nd     | nd     | nd     | nd     | nd     | nd     |
| outer kinetochore protein dad2                                                                    | 385303644             | 1                                         | nd       | nd     | nd     | nd     | nd     | d      | nd     | nd     | nd     | nd     | nd     |
| forkhead transcription factor                                                                     | 385304875             | 1                                         | nd       | nd     | nd     | nd     | nd     | d      | nd     | nd     | nd     | nd     | nd     |
| translationally controlled tumor protein                                                          | 385303768             | 2                                         | nd       | nd     | d      | nd     | nd     | nd     | nd     | d      | nd     | nd     | nd     |
| putative metalloproteinase                                                                        | 385302749             | 1                                         | nd       | nd     | nd     | nd     | nd     | nd     | nd     | d      | nd     | nd     | nd     |
| putative serine threonine-protein kinase hsl1                                                     | 385304958             | 1                                         | nd       | nd     | nd     | nd     | nd     | nd     | d      | nd     | nd     | nd     | nd     |
| rho1 GTPase                                                                                       | 385301504             | 1                                         | nd       | nd     | nd     | nd     | nd     | nd     | d      | nd     | nd     | nd     | nd     |
| DNA replication licensing factor mcm6                                                             | 385303325             | 2                                         | nd       | nd     | d      | d      | nd     | nd     | nd     | nd     | nd     | nd     | nd     |
| gmp synthase                                                                                      | 385302393             | 4                                         | nd       | nd     | d      | nd     | nd     | d      | d      | nd     | d      | nd     | nd     |
| histone transcription                                                                             | 385302304             | 1                                         | nd       | nd     | nd     | nd     | nd     | nd     | nd     | nd     | nd     | nd     | d      |
| pyruvate decarboxylase                                                                            | 385305907             | 11                                        | d        | d      | d      | d      | d      | d      | d      | d      | d      | d      | d      |
| actin-like protein                                                                                | 385305958             | 1                                         | nd       | nd     | nd     | nd     | nd     | nd     | nd     | nd     | nd     | nd     | d      |
| plasma membrane ATP-binding cassette transporter                                                  | 385304040             | 1                                         | nd       | nd     | nd     | nd     | nd     | nd     | d      | nd     | nd     | nd     | nd     |
| 26s protease regulatory subunit 8                                                                 | 385301840             | 1                                         | nd       | nd     | d      | nd     | nd     | nd     | nd     | nd     | nd     | nd     | nd     |
| amino acid permease                                                                               | 385303580             | 1                                         | nd       | nd     | nd     | nd     | nd     | nd     | nd     | d      | nd     | nd     | nd     |
| ddi1-like protein                                                                                 | 385305620             | 1                                         | nd       | nd     | nd     | nd     | nd     | nd     | nd     | nd     | nd     | nd     | d      |
| hypothetical protein AWRI1499_4282                                                                | 385301659             | 2                                         | nd       | d      | nd     | nd     | nd     | nd     | nd     | nd     | nd     | d      | nd     |

# Supplemental Data for:

Križanović S, Gracin L, Cindrić M, Tomašević M, Kelšin K, Lukić K and Kovačević Ganić K.

Comparison of proteomic, metabolic, and growth profiles of *Brettanomyces bruxellensis* isolates from Croatian wines.

Am J Enol Vitic 70:77-87. doi: 10.5344/ajev.2018.18025

**Supplemental Table 2 (continued)** List of proteins expressed in the tested *Brettanomyces bruxellensis* isolates and the reference strain.

| Protein name                                                                        | NCBI accession number | No. of tested isolates expressing protein | Isolate  |        |        |        |        |        |        |        |        |        |        |
|-------------------------------------------------------------------------------------|-----------------------|-------------------------------------------|----------|--------|--------|--------|--------|--------|--------|--------|--------|--------|--------|
|                                                                                     |                       |                                           | CBS 2499 | KLV 11 | KLV 13 | KLV 14 | KLV 15 | KLV 16 | KLV 17 | KLV 18 | KLV 19 | KLV 21 | KLV 22 |
| inositol hexakisphosphate inositol polyphosphate                                    | 385302233             | 1                                         | nd       | nd     | nd     | nd     | nd     | nd     | nd     | nd     | nd     | d      | nd     |
| vacuolar protein sorting protein                                                    | 385303194             | 1                                         | nd       | nd     | d      | nd     | nd     | nd     | nd     | nd     | nd     | nd     | nd     |
| spindle pole antigen                                                                | 385305032             | 2                                         | nd       | nd     | nd     | nd     | d      | d      | nd     | nd     | nd     | nd     | nd     |
| 2-enoyl thioester reductase                                                         | 385303997             | 1                                         | nd       | nd     | nd     | d      | nd     | nd     | nd     | nd     | nd     | nd     | nd     |
| n-acetylated-alpha-linked acidic dipeptidase                                        | 385305050             | 4                                         | nd       | d      | nd     | d      | d      | nd     | nd     | nd     | nd     | d      | nd     |
| aspartic-type endopeptidase                                                         | 385305480             | 1                                         | nd       | nd     | nd     | nd     | nd     | nd     | d      | nd     | nd     | nd     | nd     |
| member of the puf protein family                                                    | 385303007             | 1                                         | nd       | nd     | nd     | nd     | nd     | d      | nd     | nd     | nd     | nd     | nd     |
| dom34-interacting protein 2                                                         | 385305892             | 1                                         | nd       | nd     | nd     | nd     | nd     | nd     | nd     | nd     | nd     | d      | nd     |
| cell cycle serine threonine-protein kinase cdc5 msd2                                | 385302929             | 1                                         | nd       | nd     | d      | nd     | nd     | nd     | nd     | nd     | nd     | nd     | nd     |
| skn7p                                                                               | 385304865             | 2                                         | d        | nd     | d      | nd     | nd     | nd     | nd     | nd     | nd     | nd     | nd     |
| swc5p                                                                               | 385305944             | 1                                         | nd       | nd     | nd     | nd     | nd     | nd     | nd     | nd     | nd     | nd     | d      |
| cell wall biogenesis protein                                                        | 385302053             | 2                                         | nd       | nd     | nd     | nd     | nd     | d      | d      | nd     | nd     | nd     | nd     |
| fad dependent                                                                       | 385304496             | 2                                         | d        | nd     | d      | nd     | nd     | nd     | nd     | nd     | nd     | nd     | nd     |
| snf2 family helicase                                                                | 385301664             | 2                                         | nd       | d      | nd     | nd     | nd     | nd     | nd     | nd     | nd     | d      | nd     |
| mitochondrial ribosomal protein of small subunit                                    | 385302770             | 1                                         | nd       | nd     | d      | nd     | nd     | nd     | nd     | nd     | nd     | nd     | nd     |
| subunit vi of cytochrome c oxidase                                                  | 385305511             | 5                                         | d        | nd     | nd     | nd     | d      | nd     | d      | d      | d      | nd     | nd     |
| hypothetical protein AWRI1499_2143                                                  | 385303910             | 1                                         | nd       | d      | nd     | nd     | nd     | nd     | nd     | nd     | nd     | nd     | nd     |
| hypothetical protein AWRI1499_1478                                                  | 385304596             | 2                                         | nd       | nd     | nd     | nd     | nd     | nd     | nd     | d      | nd     | d      | nd     |
| 2-dehydropantoate 2-reductase                                                       | 385304342             | 1                                         | d        | nd     | nd     | nd     | nd     | nd     | nd     | nd     | nd     | nd     | nd     |
| putative u3 snornc component                                                        | 385302722             | 2                                         | nd       | nd     | nd     | nd     | nd     | nd     | nd     | d      | d      | nd     | nd     |
| 6-Phosphofructokinase alpha subunit                                                 | 385305586             | 4                                         | nd       | d      | nd     | nd     | nd     | nd     | d      | d      | nd     | d      | nd     |
| putative calcium channel                                                            | 385302058             | 2                                         | nd       | nd     | nd     | nd     | nd     | nd     | nd     | d      | nd     | nd     | d      |
| hypothetical protein AWRI1499_3996                                                  | 385301960             | 3                                         | d        | nd     | d      | d      | nd     | nd     | nd     | nd     | nd     | nd     | nd     |
| cell division control protein                                                       | 385304471             | 1                                         | nd       | nd     | nd     | nd     | nd     | nd     | nd     | nd     | nd     | nd     | d      |
| helicase swr1                                                                       | 385301536             | 2                                         | nd       | nd     | nd     | nd     | d      | d      | nd     | nd     | nd     | nd     | nd     |
| succinate dehydrogenase flavoprotein subunit                                        | 385302409             | 1                                         | nd       | d      | nd     | nd     | nd     | nd     | nd     | nd     | nd     | nd     | nd     |
| alcohol dehydrogenase                                                               | 385301733             | 10                                        | d        | d      | d      | d      | d      | d      | d      | d      | nd     | d      | d      |
| 6-Phosphofructo-2- inhibited by phosphoenolpyruvate and sn-glycerol 3- has negligib | 385301337             | 1                                         | nd       | nd     | nd     | nd     | d      | nd     | nd     | nd     | nd     | nd     | nd     |
| casein kinase II                                                                    | 385305476             | 2                                         | d        | nd     | d      | nd     | nd     | nd     | nd     | nd     | nd     | nd     | nd     |
| polyphosphatidylinositol phosphatase                                                | 385301378             | 1                                         | nd       | nd     | nd     | nd     | nd     | nd     | nd     | nd     | nd     | d      | nd     |
| putative conserved endoplasmic reticulum protein                                    | 385304331             | 1                                         | nd       | nd     | d      | nd     | nd     | nd     | nd     | nd     | nd     | nd     | nd     |
| regulatory subunit of cdc7p-dbf4p kinase complex                                    | 385305988             | 2                                         | nd       | nd     | nd     | nd     | nd     | nd     | d      | d      | nd     | nd     | nd     |
| transcription factor TFIIC complex subunit sfc3                                     | 385304424             | 1                                         | nd       | nd     | nd     | nd     | nd     | nd     | d      | nd     | nd     | nd     | nd     |
| hypothetical protein AWRI1499_3345                                                  | 385302611             | 1                                         | nd       | nd     | nd     | nd     | nd     | nd     | nd     | nd     | nd     | d      | nd     |
| hypothetical protein AWRI1499_3661                                                  | 385302327             | 1                                         | nd       | nd     | nd     | nd     | nd     | nd     | d      | nd     | nd     | nd     | nd     |
| 60s ribosomal protein l29                                                           | 385301054             | 3                                         | nd       | d      | d      | nd     | d      | nd     | nd     | nd     | nd     | nd     | nd     |
| putative yta7-like ATPase                                                           | 385305588             | 4                                         | nd       | nd     | d      | nd     | nd     | d      | nd     | d      | d      | nd     | nd     |
| translational activator gcn1                                                        | 385304412             | 3                                         | nd       | nd     | nd     | nd     | nd     | nd     | d      | nd     | nd     | d      | nd     |
| proline utilization trans-activator                                                 | 385305671             | 1                                         | nd       | nd     | nd     | nd     | nd     | nd     | nd     | d      | nd     | nd     | nd     |
| methionine aminopeptidase                                                           | 385302779             | 2                                         | nd       | nd     | nd     | nd     | nd     | nd     | nd     | d      | nd     | d      | nd     |
| n-terminal acetyltransferase                                                        | 385301213             | 1                                         | nd       | nd     | nd     | nd     | nd     | nd     | nd     | d      | nd     | nd     | nd     |

# Supplemental Data for:

Križanović S, Gracin L, Cindrić M, Tomašević M, Kelšin K, Lukić K and Kovačević Ganić K.

Comparison of proteomic, metabolic, and growth profiles of *Brettanomyces bruxellensis* isolates from Croatian wines.

Am J Enol Vitic 70:77-87. doi: 10.5344/ajev.2018.18025

**Supplemental Table 2 (continued)** List of proteins expressed in the tested *Brettanomyces bruxellensis* isolates and the reference strain.

| Protein name                                                                                    | NCBI accession number | No. of tested isolates expressing protein | Isolate  |        |        |        |        |        |        |        |        |        |        |
|-------------------------------------------------------------------------------------------------|-----------------------|-------------------------------------------|----------|--------|--------|--------|--------|--------|--------|--------|--------|--------|--------|
|                                                                                                 |                       |                                           | CBS 2499 | KLV 11 | KLV 13 | KLV 14 | KLV 15 | KLV 16 | KLV 17 | KLV 18 | KLV 19 | KLV 21 | KLV 22 |
| peroxisomal membrane protein pmp47b                                                             | 385304606             | 1                                         | nd       | nd     | nd     | d      | nd     | nd     | nd     | nd     | nd     | nd     | nd     |
| dead deah box helicase                                                                          | 385305127             | 2                                         | nd       | nd     | nd     | nd     | d      | nd     | nd     | d      | nd     | nd     | nd     |
| ydl063c-like protein                                                                            | 385302920             | 1                                         | nd       | nd     | nd     | nd     | nd     | d      | nd     | nd     | nd     | nd     | nd     |
| ymi002w-like protein                                                                            | 385302243             | 1                                         | d        | nd     | nd     | nd     | nd     | nd     | nd     | nd     | nd     | nd     | nd     |
| hypothetical protein AWRI1499_4166                                                              | 385301797             | 1                                         | nd       | nd     | nd     | nd     | nd     | nd     | nd     | d      | nd     | nd     | nd     |
| dot1p                                                                                           | 385304630             | 1                                         | nd       | nd     | nd     | d      | nd     | nd     | nd     | nd     | nd     | nd     | nd     |
| endonuclease exonuclease phosphatase family protein                                             | 385301808             | 1                                         | nd       | nd     | nd     | nd     | nd     | nd     | nd     | nd     | nd     | d      | nd     |
| putative sir2 family histone deacetylase                                                        | 385301106             | 1                                         | nd       | nd     | nd     | nd     | nd     | nd     | nd     | nd     | nd     | d      | nd     |
| regulator of glucose repression                                                                 | 385305401             | 1                                         | nd       | nd     | nd     | nd     | nd     | nd     | nd     | d      | nd     | nd     | nd     |
| translocation protein sec62                                                                     | 385305241             | 1                                         | nd       | nd     | nd     | nd     | nd     | d      | nd     | nd     | nd     | nd     | nd     |
| alpha-isopropylmalate synthase                                                                  | 385304355             | 1                                         | nd       | nd     | nd     | nd     | nd     | d      | nd     | nd     | nd     | nd     | nd     |
| translation initiation factor subunit a (eif-3a)                                                | 385306032             | 2                                         | nd       | nd     | nd     | nd     | d      | nd     | d      | nd     | nd     | nd     | nd     |
| t-snare required for er membrane fusion and vesicular traffic                                   | 385301957             | 1                                         | nd       | nd     | nd     | nd     | d      | nd     | nd     | nd     | nd     | nd     | nd     |
| et-dependent methyltransferase involved in rRNA processing and 60s ribosomal subunit maturation | 385305187             | 1                                         | nd       | nd     | nd     | nd     | nd     | nd     | nd     | nd     | nd     | d      | nd     |
| hypothetical protein AWRI1499_2926                                                              | 385303065             | 3                                         | d        | nd     | nd     | d      | nd     | nd     | nd     | nd     | nd     | nd     | d      |
| member ras oncogene family                                                                      | 385303857             | 2                                         | nd       | nd     | nd     | nd     | nd     | d      | d      | nd     | nd     | nd     | nd     |
| exonuclease 1                                                                                   | 385302014             | 1                                         | nd       | nd     | nd     | nd     | nd     | nd     | d      | nd     | nd     | nd     | nd     |
| hypothetical protein AWRI1499_1801                                                              | 385304268             | 1                                         | nd       | nd     | nd     | d      | nd     | nd     | nd     | nd     | nd     | nd     | nd     |
| u3 small nucleolar ribonucleoprotein imp3                                                       | 385304748             | 1                                         | nd       | nd     | nd     | d      | nd     | nd     | nd     | nd     | nd     | nd     | nd     |
| transcription factor                                                                            | 385302108             | 1                                         | nd       | nd     | nd     | nd     | nd     | nd     | nd     | nd     | nd     | nd     | d      |
| DNA replication licensing factor mcm5                                                           | 385304932             | 1                                         | nd       | nd     | nd     | nd     | nd     | nd     | nd     | d      | nd     | nd     | nd     |
| sister chromatid separation protein                                                             | 385302111             | 1                                         | nd       | nd     | d      | nd     | nd     | nd     | nd     | nd     | nd     | nd     | nd     |
| phosphatidylinositol 3-kinase tor2                                                              | 385304870             | 5                                         | nd       | nd     | d      | d      | nd     | nd     | d      | nd     | d      | nd     | d      |
| endosomal snare protein                                                                         | 385301594             | 1                                         | nd       | nd     | nd     | nd     | nd     | nd     | nd     | nd     | d      | nd     | nd     |
| hypothetical protein AWRI1499_3601                                                              | 385302403             | 1                                         | nd       | nd     | nd     | nd     | nd     | nd     | d      | nd     | nd     | nd     | nd     |
| rps26bp                                                                                         | 385305224             | 6                                         | nd       | d      | nd     | nd     | d      | nd     | nd     | d      | d      | d      | d      |
| hxx2p                                                                                           | 385306009             | 11                                        | d        | d      | d      | d      | d      | d      | d      | d      | d      | d      | d      |
| glycogen phosphorylase                                                                          | 385304326             | 1                                         | nd       | nd     | d      | nd     | nd     | nd     | nd     | nd     | nd     | nd     | nd     |
| eukaryotic translation initiation factor 5a                                                     | 385305439             | 11                                        | d        | d      | d      | d      | d      | d      | d      | d      | d      | d      | d      |
| DNA-binding protein of the mitochondria involved in repair of mitochondrial DNA                 | 385305974             | 1                                         | nd       | nd     | nd     | nd     | nd     | nd     | nd     | d      | nd     | nd     | nd     |
| 60s ribosomal protein                                                                           | 385305996             | 6                                         | d        | d      | d      | d      | d      | nd     | nd     | nd     | nd     | nd     | d      |
| ATPase required for the release of sec17p                                                       | 385301843             | 1                                         | nd       | nd     | nd     | nd     | nd     | d      | nd     | nd     | nd     | nd     | nd     |
| putative mitochondrial tRNA modification protein                                                | 385303389             | 2                                         | nd       | nd     | nd     | nd     | d      | nd     | nd     | nd     | nd     | d      | nd     |
| mitochondrial respiratory chain complexes assembly protein rca1                                 | 385301779             | 1                                         | nd       | nd     | nd     | nd     | nd     | nd     | nd     | d      | nd     | nd     | nd     |
| extracellular matrix protein 14 precursor                                                       | 385301050             | 1                                         | nd       | nd     | nd     | nd     | nd     | nd     | nd     | nd     | nd     | d      | nd     |
| putative mitochondrial ribosomal protein s13                                                    | 385301860             | 1                                         | nd       | nd     | nd     | nd     | d      | nd     | nd     | nd     | nd     | nd     | nd     |
| nucleoporin gle2                                                                                | 385303333             | 1                                         | nd       | nd     | nd     | nd     | nd     | nd     | nd     | d      | nd     | nd     | nd     |
| DNA2 nam7                                                                                       | 385304235             | 1                                         | nd       | nd     | nd     | nd     | nd     | nd     | d      | nd     | nd     | nd     | nd     |
| ylr001c-like protein                                                                            | 385301029             | 1                                         | nd       | nd     | nd     | nd     | nd     | d      | nd     | nd     | nd     | nd     | nd     |
| zn 2cys6 transcription factor                                                                   | 385300921             | 1                                         | nd       | nd     | nd     | nd     | nd     | nd     | nd     | nd     | nd     | d      | nd     |
| ymr118c-like protein                                                                            | 385302689             | 1                                         | nd       | nd     | d      | nd     | nd     | nd     | nd     | nd     | nd     | nd     | nd     |



# Supplemental Data for:

Križanović S, Gracin L, Cindrić M, Tomašević M, Kelšin K, Lukić K and Kovačević Ganić K.

Comparison of proteomic, metabolic, and growth profiles of *Brettanomyces bruxellensis* isolates from Croatian wines.

Am J Enol Vitic 70:77-87. doi: 10.5344/ajev.2018.18025

**Supplemental Table 2 (continued)** List of proteins expressed in the tested *Brettanomyces bruxellensis* isolates and the reference strain.

| Protein name                                                                 | NCBI accession number | No. of tested isolates expressing protein | Isolate  |        |        |        |        |        |        |        |        |        |        |
|------------------------------------------------------------------------------|-----------------------|-------------------------------------------|----------|--------|--------|--------|--------|--------|--------|--------|--------|--------|--------|
|                                                                              |                       |                                           | CBS 2499 | KLV 11 | KLV 13 | KLV 14 | KLV 15 | KLV 16 | KLV 17 | KLV 18 | KLV 19 | KLV 21 | KLV 22 |
| emi2p                                                                        | 385304176             | 7                                         | nd       | nd     | d      | d      | d      | d      | d      | d      | nd     | d      | nd     |
| elongation factor 3                                                          | 385302802             | 4                                         | d        | nd     | nd     | d      | nd     | d      | nd     | d      | nd     | nd     | nd     |
| pak2b protein                                                                | 385301389             | 1                                         | nd       | nd     | nd     | d      | nd     | nd     | nd     | nd     | nd     | nd     | nd     |
| hypothetical protein AWRI1499_4129                                           | 385301855             | 1                                         | nd       | nd     | d      | nd     | nd     | nd     | nd     | nd     | nd     | nd     | nd     |
| yfl042c-like protein                                                         | 385305612             | 4                                         | nd       | nd     | d      | d      | nd     | d      | d      | nd     | nd     | nd     | nd     |
| elongation factor 1-gamma 1                                                  | 385303846             | 1                                         | nd       | nd     | nd     | d      | nd     | nd     | nd     | nd     | nd     | nd     | nd     |
| methionyl-tRNA synthetase                                                    | 385303256             | 1                                         | nd       | nd     | nd     | d      | nd     | nd     | nd     | nd     | nd     | nd     | nd     |
| hypothetical protein AWRI1499_1749                                           | 385304312             | 1                                         | nd       | nd     | nd     | nd     | nd     | d      | nd     | nd     | nd     | nd     | nd     |
| protoplast secreted protein 2 precursor                                      | 385302386             | 8                                         | nd       | d      | d      | d      | nd     | d      | d      | d      | d      | d      | nd     |
| regulatory subunit of trehalose-6-phosphate synthase phosphatase complex     | 385301456             | 1                                         | nd       | nd     | nd     | nd     | nd     | nd     | d      | nd     | nd     | nd     | nd     |
| peroxisomal coenzyme a peroxisomal                                           | 385303809             | 1                                         | nd       | nd     | nd     | nd     | d      | nd     | nd     | nd     | nd     | nd     | nd     |
| eukaryotic peptide chain release factor subunit 1                            | 385303279             | 1                                         | nd       | nd     | nd     | nd     | nd     | nd     | nd     | nd     | nd     | nd     | d      |
| copi vesicle coat beta                                                       | 385304719             | 1                                         | nd       | nd     | nd     | nd     | nd     | nd     | nd     | nd     | nd     | d      | nd     |
| hypothetical protein AWRI1499_4673                                           | 385301263             | 1                                         | d        | nd     | nd     | nd     | nd     | nd     | nd     | nd     | nd     | nd     | nd     |
| heat shock protein ssa2                                                      | 385303095             | 2                                         | nd       | nd     | nd     | nd     | nd     | d      | nd     | d      | nd     | nd     | nd     |
| GTP-binding protein                                                          | 385303634             | 3                                         | nd       | nd     | d      | nd     | nd     | d      | nd     | d      | nd     | nd     | nd     |
| phosphoglycerate mutase                                                      | 385300983             | 9                                         | nd       | d      | d      | d      | d      | d      | d      | d      | d      | nd     | d      |
| arginine methyltransferase                                                   | 385305316             | 1                                         | nd       | nd     | nd     | nd     | nd     | nd     | nd     | nd     | nd     | nd     | d      |
| heat shock protein 90                                                        | 385302788             | 1                                         | nd       | nd     | nd     | nd     | d      | nd     | nd     | nd     | nd     | nd     | nd     |
| ubiquitin carboxyl-terminal hydrolase, putative                              | 385302011             | 1                                         | nd       | nd     | nd     | nd     | nd     | nd     | nd     | d      | nd     | nd     | nd     |
| 40s ribosomal protein s9-b                                                   | 385304153             | 4                                         | nd       | d      | nd     | d      | nd     | d      | nd     | nd     | nd     | d      | nd     |
| 60s ribosomal protein l21-a                                                  | 385304154             | 4                                         | nd       | d      | nd     | nd     | d      | nd     | nd     | d      | d      | nd     | nd     |
| fatty acid synthetase beta subunit                                           | 385305951             | 2                                         | nd       | nd     | nd     | nd     | nd     | d      | nd     | d      | nd     | nd     | nd     |
| associated with histones spt16 pob3                                          | 385302086             | 1                                         | nd       | nd     | nd     | nd     | nd     | nd     | nd     | d      | nd     | nd     | nd     |
| ydr018c-like protein                                                         | 385303300             | 1                                         | nd       | nd     | nd     | nd     | nd     | nd     | nd     | nd     | d      | nd     | nd     |
| glucosamine--fructose-6-phosphate aminotransferase                           | 385305628             | 4                                         | nd       | nd     | nd     | d      | d      | d      | nd     | nd     | nd     | nd     | d      |
| transducin family protein wd-40 repeat family protein                        | 385302184             | 2                                         | nd       | nd     | nd     | nd     | nd     | nd     | nd     | d      | d      | nd     | nd     |
| essential protein involved in nuclear export of mss4p                        | 385303557             | 2                                         | nd       | d      | d      | nd     | nd     | nd     | nd     | nd     | nd     | nd     | nd     |
| hdf2 protein                                                                 | 385304754             | 1                                         | nd       | nd     | nd     | nd     | nd     | d      | nd     | nd     | nd     | nd     | nd     |
| aromatic amino acid aminotransferase i                                       | 385304822             | 1                                         | d        | nd     | nd     | nd     | nd     | nd     | nd     | nd     | nd     | nd     | nd     |
| 60s ribosomal protein l15-b                                                  | 385304665             | 5                                         | d        | nd     | d      | d      | nd     | d      | nd     | nd     | nd     | d      | nd     |
| putative peroxisomal biogenesis aaa ATPase pex1                              | 385304701             | 1                                         | nd       | nd     | nd     | nd     | nd     | d      | nd     | nd     | nd     | nd     | nd     |
| hypothetical protein AWRI1499_0917                                           | 385305143             | 2                                         | nd       | nd     | nd     | nd     | nd     | d      | d      | nd     | nd     | nd     | nd     |
| ser thr protein phosphatase                                                  | 385302714             | 1                                         | nd       | d      | nd     | nd     | nd     | nd     | nd     | nd     | nd     | nd     | nd     |
| vacuolar ATP synthase subunit a                                              | 385304502             | 1                                         | nd       | nd     | nd     | nd     | nd     | nd     | nd     | nd     | d      | nd     | nd     |
| erg11p                                                                       | 385301286             | 1                                         | nd       | nd     | nd     | d      | nd     | nd     | nd     | nd     | nd     | nd     | nd     |
| rpp1ap                                                                       | 385304937             | 3                                         | d        | nd     | nd     | nd     | d      | d      | nd     | nd     | nd     | nd     | nd     |
| eukaryotic translation initiation factor 5                                   | 385304306             | 1                                         | d        | nd     | nd     | nd     | nd     | nd     | nd     | nd     | nd     | nd     | nd     |
| hypothetical protein AWRI1499_3612                                           | 385302365             | 1                                         | nd       | nd     | nd     | nd     | nd     | nd     | d      | nd     | nd     | nd     | nd     |
| hsp70-family chaperone                                                       | 385303005             | 1                                         | nd       | nd     | nd     | d      | nd     | nd     | nd     | nd     | nd     | nd     | nd     |
| nujm ( ) subunit of mitochondrial NADH:ubiquinone oxidoreductase (complex I) | 385301257             | 1                                         | nd       | nd     | nd     | nd     | nd     | nd     | nd     | nd     | nd     | nd     | d      |

# Supplemental Data for:

Križanović S, Gracin L, Cindrić M, Tomašević M, Kelšin K, Lukić K and Kovačević Ganić K.

Comparison of proteomic, metabolic, and growth profiles of *Brettanomyces bruxellensis* isolates from Croatian wines.

Am J Enol Vitic 70:77-87. doi: 10.5344/ajev.2018.18025

**Supplemental Table 2 (continued)** List of proteins expressed in the tested *Brettanomyces bruxellensis* isolates and the reference strain.

| Protein name                                                                                     | NCBI accession number | No. of tested isolates expressing protein | Isolate  |        |        |        |        |        |        |        |        |        |        |
|--------------------------------------------------------------------------------------------------|-----------------------|-------------------------------------------|----------|--------|--------|--------|--------|--------|--------|--------|--------|--------|--------|
|                                                                                                  |                       |                                           | CBS 2499 | KLV 11 | KLV 13 | KLV 14 | KLV 15 | KLV 16 | KLV 17 | KLV 18 | KLV 19 | KLV 21 | KLV 22 |
| ABC transporter                                                                                  | 385304039             | 1                                         | d        | nd     | nd     | nd     | nd     | nd     | nd     | nd     | nd     | nd     | nd     |
| protein whose overexpression suppresses the synthetic lethality of the hal3 sit4 double mutation | 385305829             | 1                                         | nd       | nd     | nd     | nd     | nd     | nd     | nd     | nd     | d      | nd     | nd     |
| inorganic phosphate transporter                                                                  | 385304712             | 1                                         | nd       | nd     | nd     | nd     | nd     | nd     | nd     | nd     | nd     | nd     | d      |
| putative guanine nucleotide exchange factor eif-2b gamma subunit                                 | 385302902             | 2                                         | nd       | nd     | d      | nd     | nd     | nd     | nd     | nd     | d      | nd     | nd     |
| putative RNA Pol II transcription elongation factor                                              | 385304962             | 1                                         | d        | nd     | nd     | nd     | nd     | nd     | nd     | nd     | nd     | nd     | nd     |
| putative nuclear thioredoxin peroxidase                                                          | 385305339             | 1                                         | nd       | nd     | nd     | nd     | nd     | nd     | nd     | d      | nd     | nd     | nd     |
| hypothetical protein AWRI1499_4281                                                               | 385301658             | 2                                         | nd       | nd     | d      | nd     | nd     | nd     | nd     | nd     | d      | nd     | nd     |
| putative mRNA deadenylase and ccr4-not complex subunit cdc39p                                    | 385302543             | 1                                         | nd       | nd     | nd     | nd     | nd     | d      | nd     | nd     | nd     | nd     | nd     |
| putative cyclic nucleotide-binding phospholipase                                                 | 385305953             | 1                                         | nd       | nd     | d      | nd     | nd     | nd     | nd     | nd     | nd     | nd     | nd     |
| f-box protein component of the scf ubiquitin-ligase complex                                      | 385304303             | 3                                         | d        | nd     | nd     | nd     | nd     | nd     | d      | nd     | nd     | nd     | d      |
| putative fungal zinc cluster transcription factor                                                | 385306017             | 4                                         | nd       | d      | nd     | nd     | d      | nd     | d      | nd     | nd     | nd     | nd     |
| putative protein lysine methyltransferase set5                                                   | 385304201             | 2                                         | d        | nd     | nd     | nd     | nd     | nd     | nd     | nd     | nd     | nd     | d      |
| carboxypeptidase y precursor                                                                     | 385303976             | 1                                         | d        | nd     | nd     | nd     | nd     | nd     | nd     | nd     | nd     | nd     | nd     |
| s-adenosyl-l-homocysteine hydrolase                                                              | 385302959             | 2                                         | nd       | d      | nd     | nd     | nd     | d      | nd     | nd     | nd     | nd     | nd     |
| DNA-binding protein                                                                              | 385301012             | 1                                         | nd       | nd     | nd     | nd     | nd     | d      | nd     | nd     | nd     | nd     | nd     |
| putative sur7 family cortical patch protein                                                      | 385301453             | 2                                         | nd       | nd     | nd     | nd     | d      | nd     | nd     | nd     | nd     | nd     | d      |
| transcriptional modulator                                                                        | 385302237             | 1                                         | nd       | nd     | nd     | nd     | nd     | d      | nd     | nd     | nd     | nd     | nd     |
| izh2p                                                                                            | 385305899             | 1                                         | nd       | d      | nd     | nd     | nd     | nd     | nd     | nd     | nd     | nd     | nd     |
| hypothetical protein AWRI1499_3045                                                               | 385302996             | 1                                         | nd       | nd     | nd     | nd     | nd     | nd     | d      | nd     | nd     | nd     | nd     |
| dna helicase involved in rDNA replication and ty1 transposition                                  | 385304756             | 1                                         | nd       | nd     | nd     | nd     | d      | nd     | nd     | nd     | nd     | nd     | nd     |
| nuclear condensin complex subunit                                                                | 385302742             | 1                                         | nd       | nd     | nd     | nd     | nd     | nd     | d      | nd     | nd     | nd     | nd     |
| hypothetical protein AWRI1499_2409                                                               | 385303553             | 1                                         | nd       | nd     | nd     | nd     | nd     | nd     | nd     | d      | nd     | nd     | nd     |
| putative nuclear DNA repair complex smc ATPase                                                   | 385303814             | 2                                         | nd       | nd     | nd     | nd     | nd     | nd     | d      | nd     | nd     | nd     | d      |
| nucleoside diphosphate kinase                                                                    | 385302566             | 1                                         | nd       | nd     | d      | nd     | nd     | nd     | nd     | nd     | nd     | nd     | nd     |
| mitogen-activated protein kinase kinase                                                          | 385305558             | 2                                         | nd       | d      | nd     | nd     | nd     | nd     | d      | nd     | nd     | nd     | nd     |
| methionyl-tRNA catalyzes the formylation of initiator met-tRNA in mitochondria                   | 385306023             | 1                                         | nd       | nd     | nd     | nd     | nd     | d      | nd     | nd     | nd     | nd     | nd     |
| vacuolar fusion protein mon1                                                                     | 385305898             | 1                                         | nd       | nd     | nd     | nd     | nd     | nd     | nd     | nd     | d      | nd     | nd     |
| transcription initiation factor TFIID subunit, putative                                          | 385302992             | 1                                         | nd       | nd     | nd     | nd     | nd     | nd     | nd     | nd     | d      | nd     | nd     |
| mRNA splicing factor RNA helicase                                                                | 385304849             | 1                                         | nd       | nd     | nd     | nd     | nd     | nd     | nd     | nd     | nd     | nd     | d      |
| protein phosphorylates the alpha-subunit of translation initiation factor eif2                   | 385305101             | 3                                         | nd       | nd     | d      | d      | nd     | nd     | d      | nd     | nd     | nd     | nd     |
| putative zinc finger transcription factor                                                        | 385303595             | 1                                         | nd       | nd     | nd     | nd     | nd     | nd     | d      | nd     | nd     | nd     | nd     |
| s-adenosylmethionine synthetase                                                                  | 385305429             | 1                                         | nd       | nd     | nd     | nd     | nd     | nd     | d      | nd     | nd     | nd     | nd     |
| tRNA um 2 -o-methyltransferase                                                                   | 385305082             | 1                                         | nd       | d      | nd     | nd     | nd     | nd     | nd     | nd     | nd     | nd     | nd     |
| map kinase                                                                                       | 385301250             | 2                                         | d        | nd     | nd     | d      | nd     | nd     | nd     | nd     | nd     | nd     | nd     |
| golgi-associated retrograde protein                                                              | 385303618             | 1                                         | nd       | nd     | nd     | d      | nd     | nd     | nd     | nd     | nd     | nd     | nd     |

# Supplemental Data for:

Križanović S, Gracin L, Cindrić M, Tomašević M, Kelšin K, Lukić K and Kovačević Ganić K.

Comparison of proteomic, metabolic, and growth profiles of *Brettanomyces bruxellensis* isolates from Croatian wines.

Am J Enol Vitic 70:77-87. doi: 10.5344/ajev.2018.18025

| Supplemental Table 2 (continued) List of proteins expressed in the tested <i>Brettanomyces bruxellensis</i> isolates and the reference strain. |                       |                                           |          |        |        |        |        |        |        |        |        |        |        |
|------------------------------------------------------------------------------------------------------------------------------------------------|-----------------------|-------------------------------------------|----------|--------|--------|--------|--------|--------|--------|--------|--------|--------|--------|
| Protein name                                                                                                                                   | NCBI accession number | No. of tested isolates expressing protein | Isolate  |        |        |        |        |        |        |        |        |        |        |
|                                                                                                                                                |                       |                                           | CBS 2499 | KLV 11 | KLV 13 | KLV 14 | KLV 15 | KLV 16 | KLV 17 | KLV 18 | KLV 19 | KLV 21 | KLV 22 |
| triosephosphate isomerase                                                                                                                      | 385304484             | 3                                         | nd       | nd     | d      | nd     | nd     | d      | nd     | d      | nd     | nd     | nd     |
| putative DNAJ-like heat-shock protein                                                                                                          | 385301859             | 1                                         | nd       | nd     | nd     | nd     | nd     | nd     | nd     | d      | nd     | nd     | nd     |
| translation initiation factor subunit of the mRNA cap-binding protein complex                                                                  | 385301841             | 1                                         | nd       | nd     | d      | nd     | nd     | nd     | nd     | nd     | nd     | nd     | nd     |
| heat shock protein hsp20                                                                                                                       | 385305335             | 1                                         | nd       | nd     | nd     | d      | nd     | nd     | nd     | nd     | nd     | nd     | nd     |
| flavohemoprotein                                                                                                                               | 385305723             | 3                                         | nd       | nd     | nd     | d      | nd     | d      | nd     | d      | nd     | nd     | nd     |
| 60s ribosomal protein l8-b                                                                                                                     | 385306057             | 1                                         | nd       | nd     | nd     | nd     | nd     | nd     | nd     | nd     | nd     | d      | nd     |
| ribosome biogenesis protein                                                                                                                    | 385301151             | 1                                         | nd       | nd     | nd     | nd     | nd     | nd     | d      | nd     | nd     | nd     | nd     |
| phosphoenolpyruvate carboxykinase                                                                                                              | 385301565             | 1                                         | nd       | d      | nd     | nd     | nd     | nd     | nd     | nd     | nd     | nd     | nd     |
| sumo activating enzyme                                                                                                                         | 385301716             | 2                                         | nd       | nd     | nd     | nd     | d      | nd     | nd     | d      | nd     | nd     | nd     |
| iah1p                                                                                                                                          | 385302842             | 3                                         | nd       | nd     | nd     | nd     | d      | d      | d      | nd     | nd     | nd     | nd     |
| ribonucleoside-diphosphate reductase small chain                                                                                               | 385302064             | 1                                         | nd       | d      | nd     | nd     | nd     | nd     | nd     | nd     | nd     | nd     | nd     |
| zinc finger protein                                                                                                                            | 385302664             | 1                                         | nd       | nd     | nd     | nd     | nd     | nd     | nd     | nd     | nd     | nd     | d      |
| delta-1-pyrroline-5-carboxylate dehydrogenase                                                                                                  | 385303472             | 2                                         | nd       | nd     | nd     | nd     | nd     | d      | nd     | d      | nd     | nd     | nd     |
| ydj1p                                                                                                                                          | 385301858             | 1                                         | nd       | nd     | d      | nd     | nd     | nd     | nd     | nd     | nd     | nd     | nd     |
| NADH-cytochrome b5 reductase                                                                                                                   | 385303263             | 1                                         | nd       | nd     | nd     | nd     | nd     | nd     | nd     | nd     | d      | nd     | nd     |
| putative vacuolar polyphosphate synthetase                                                                                                     | 385302818             | 2                                         | nd       | nd     | nd     | nd     | d      | nd     | nd     | nd     | nd     | nd     | d      |
| glycerol dehydrogenase                                                                                                                         | 385303323             | 2                                         | nd       | nd     | nd     | d      | nd     | d      | nd     | nd     | nd     | nd     | nd     |
| duf757 domain-containing protein                                                                                                               | 385302279             | 1                                         | nd       | nd     | d      | nd     | nd     | nd     | nd     | nd     | nd     | nd     | nd     |
| carrier protein                                                                                                                                | 385302102             | 4                                         | nd       | nd     | nd     | nd     | d      | d      | d      | d      | nd     | nd     | nd     |
| putative ccr4 associated factor caf17p                                                                                                         | 385302601             | 1                                         | nd       | d      | nd     | nd     | nd     | nd     | nd     | nd     | nd     | nd     | nd     |
| cell differentiation protein rcd1                                                                                                              | 385305804             | 1                                         | nd       | nd     | nd     | nd     | nd     | nd     | nd     | nd     | nd     | nd     | d      |
| putative nuclear condensin complex subunit h                                                                                                   | 385305233             | 1                                         | nd       | d      | nd     | nd     | nd     | nd     | nd     | nd     | nd     | nd     | nd     |
| glutamyl-tRNA synthetase                                                                                                                       | 385305573             | 1                                         | nd       | nd     | d      | nd     | nd     | nd     | nd     | nd     | nd     | nd     | nd     |
| ymr295c-like protein                                                                                                                           | 385302634             | 1                                         | nd       | nd     | nd     | d      | nd     | nd     | nd     | nd     | nd     | nd     | nd     |
| hypothetical protein AWRI1499_0862                                                                                                             | 385305261             | 2                                         | nd       | nd     | nd     | nd     | d      | d      | nd     | nd     | nd     | nd     | nd     |
| yil096c-like protein                                                                                                                           | 385304374             | 1                                         | nd       | nd     | d      | nd     | nd     | nd     | nd     | nd     | nd     | nd     | nd     |
| nucleolar protein                                                                                                                              | 385305083             | 1                                         | nd       | nd     | nd     | nd     | nd     | nd     | nd     | nd     | nd     | d      | nd     |
| histone acetyltransferase                                                                                                                      | 385305394             | 1                                         | nd       | nd     | nd     | d      | nd     | nd     | nd     | nd     | nd     | nd     | nd     |
| shwachman-bodian-diamond syndrome protein                                                                                                      | 385302572             | 2                                         | nd       | nd     | nd     | nd     | nd     | nd     | d      | d      | nd     | nd     | nd     |
| c2h2 finger domain protein                                                                                                                     | 385301478             | 3                                         | nd       | nd     | d      | nd     | d      | nd     | nd     | nd     | nd     | nd     | d      |
| putative c1-tetrahydrofolate synthase                                                                                                          | 385301376             | 1                                         | nd       | nd     | nd     | nd     | nd     | d      | nd     | nd     | nd     | nd     | nd     |
| rap1-interacting involved in establishment of repressed chromatin                                                                              | 385303027             | 1                                         | nd       | nd     | nd     | nd     | nd     | nd     | nd     | d      | nd     | nd     | nd     |
| dolichyl phosphate-mannose:protein o-mannosyltransferase                                                                                       | 385305571             | 1                                         | nd       | nd     | nd     | nd     | nd     | d      | nd     | nd     | nd     | nd     | nd     |
| arginyl-tRNA synthetase                                                                                                                        | 385305847             | 1                                         | d        | nd     | nd     | nd     | nd     | nd     | nd     | nd     | nd     | nd     | nd     |
| class e vacuolar-protein sorting and endocytosis factor                                                                                        | 385303212             | 1                                         | nd       | nd     | nd     | d      | nd     | nd     | nd     | nd     | nd     | nd     | nd     |
| o-acetylhomoserine sulfhydrylase                                                                                                               | 385306050             | 2                                         | nd       | d      | nd     | nd     | nd     | nd     | nd     | nd     | d      | nd     | nd     |
| chromatin remodelling complex ATPase chain isw1                                                                                                | 385302379             | 2                                         | nd       | nd     | d      | nd     | nd     | nd     | nd     | nd     | nd     | d      | nd     |
| inorganic pyrophosphatase                                                                                                                      | 385303660             | 8                                         | nd       | nd     | d      | d      | d      | d      | d      | d      | nd     | d      | d      |
| transcription initiation factor TFIIF middle subunit                                                                                           | 385304830             | 1                                         | nd       | nd     | nd     | nd     | nd     | d      | nd     | nd     | nd     | nd     | nd     |
| putative protein kinase                                                                                                                        | 385301849             | 4                                         | nd       | d      | d      | nd     | nd     | nd     | nd     | nd     | d      | nd     | d      |

# Supplemental Data for:

Križanović S, Gracin L, Cindrić M, Tomašević M, Kelšin K, Lukić K and Kovačević Ganić K.

Comparison of proteomic, metabolic, and growth profiles of *Brettanomyces bruxellensis* isolates from Croatian wines.

Am J Enol Vitic 70:77-87. doi: 10.5344/ajev.2018.18025

**Supplemental Table 2 (continued)** List of proteins expressed in the tested *Brettanomyces bruxellensis* isolates and the reference strain.

| Protein name                                                                          | NCBI accession number | No. of tested isolates expressing protein | Isolate  |        |        |        |        |        |        |        |        |        |        |
|---------------------------------------------------------------------------------------|-----------------------|-------------------------------------------|----------|--------|--------|--------|--------|--------|--------|--------|--------|--------|--------|
|                                                                                       |                       |                                           | CBS 2499 | KLV 11 | KLV 13 | KLV 14 | KLV 15 | KLV 16 | KLV 17 | KLV 18 | KLV 19 | KLV 21 | KLV 22 |
| camp-dependent protein kinase catalytic subunit                                       | 385302173             | 1                                         | nd       | nd     | nd     | nd     | nd     | nd     | nd     | nd     | nd     | d      | nd     |
| hypothetical protein AWRI1499_2124                                                    | 385303921             | 1                                         | nd       | nd     | nd     | nd     | nd     | nd     | nd     | nd     | d      | nd     | nd     |
| ygr012w-like protein                                                                  | 385301093             | 1                                         | nd       | nd     | nd     | d      | nd     | nd     | nd     | nd     | nd     | nd     | nd     |
| hypothetical protein AWRI1499_0454                                                    | 385305616             | 1                                         | nd       | nd     | nd     | d      | nd     | nd     | nd     | nd     | nd     | nd     | nd     |
| putative autophagy-related protein kinase atg1                                        | 385305901             | 1                                         | nd       | nd     | nd     | nd     | nd     | nd     | nd     | nd     | d      | nd     | nd     |
| glycosyl transferase family protein                                                   | 385301877             | 3                                         | nd       | nd     | nd     | nd     | d      | nd     | d      | nd     | nd     | d      | nd     |
| NADH-ubiquinone oxidoreductase 51 kDa subunit                                         | 385303377             | 1                                         | nd       | nd     | nd     | nd     | nd     | d      | nd     | nd     | nd     | nd     | nd     |
| srb7p                                                                                 | 385305938             | 1                                         | nd       | nd     | nd     | nd     | nd     | nd     | nd     | nd     | nd     | d      | nd     |
| lysyl-tRNA synthetase                                                                 | 385304454             | 1                                         | nd       | nd     | nd     | nd     | nd     | nd     | nd     | d      | nd     | nd     | nd     |
| swr1-complex protein 3                                                                | 385305396             | 2                                         | nd       | nd     | nd     | nd     | nd     | nd     | nd     | nd     | nd     | d      | d      |
| argininosuccinate synthase                                                            | 385303232             | 1                                         | nd       | nd     | d      | nd     | nd     | nd     | nd     | nd     | nd     | nd     | nd     |
| 60s acidic ribosomal protein p2                                                       | 385304608             | 4                                         | d        | nd     | d      | d      | nd     | nd     | d      | nd     | nd     | nd     | nd     |
| 3-methyladenine DNA glycosylase                                                       | 385305619             | 1                                         | nd       | nd     | nd     | nd     | nd     | nd     | nd     | nd     | nd     | d      | nd     |
| DNA repair helicase rad3                                                              | 385302835             | 1                                         | nd       | nd     | nd     | d      | nd     | nd     | nd     | nd     | nd     | nd     | nd     |
| transcriptional activator protein gcn20                                               | 385304548             | 2                                         | nd       | nd     | d      | nd     | nd     | nd     | nd     | nd     | nd     | nd     | d      |
| protein component of the h aca snornp pseudouridylation complex                       | 385304886             | 1                                         | nd       | nd     | d      | nd     | nd     | nd     | nd     | nd     | nd     | nd     | nd     |
| with of the mitochondrial inner membrane m-aaa protease                               | 385304236             | 1                                         | nd       | nd     | nd     | nd     | nd     | nd     | nd     | nd     | nd     | nd     | d      |
| like protein kif3a                                                                    | 385304515             | 1                                         | nd       | nd     | nd     | nd     | nd     | nd     | nd     | nd     | nd     | nd     | d      |
| phosphoacetylglucosamine mutase                                                       | 385302221             | 1                                         | nd       | nd     | nd     | d      | nd     | nd     | nd     | nd     | nd     | nd     | nd     |
| putative mitochondrial protein                                                        | 385301073             | 1                                         | d        | nd     | nd     | nd     | nd     | nd     | nd     | nd     | nd     | nd     | nd     |
| hsp78p                                                                                | 385301538             | 1                                         | nd       | nd     | nd     | nd     | nd     | d      | nd     | nd     | nd     | nd     | nd     |
| ATP-dependent clp ATP-binding subunit                                                 | 385305094             | 1                                         | d        | nd     | nd     | nd     | nd     | nd     | nd     | nd     | nd     | nd     | nd     |
| hypothetical protein AWRI1499_1984                                                    | 385301356             | 2                                         | nd       | nd     | nd     | nd     | nd     | d      | nd     | d      | nd     | nd     | nd     |
| hypothetical protein AWRI1499_3282                                                    | 385304064             | 1                                         | nd       | d      | nd     | nd     | nd     | nd     | nd     | nd     | nd     | nd     | nd     |
| heat shock protein hsp88                                                              | 385302712             | 1                                         | nd       | nd     | nd     | nd     | nd     | d      | nd     | nd     | nd     | nd     | nd     |
| pre-rRNA-processing protein esf2                                                      | 385303999             | 2                                         | nd       | nd     | nd     | nd     | nd     | nd     | nd     | d      | nd     | nd     | d      |
| patatin-like phospholipase domain-containing protein                                  | 385302938             | 1                                         | nd       | nd     | nd     | nd     | nd     | d      | nd     | nd     | nd     | nd     | nd     |
| oxidation resistance protein 1                                                        | 385305001             | 1                                         | nd       | d      | nd     | nd     | nd     | nd     | nd     | nd     | nd     | nd     | nd     |
| npl3p                                                                                 | 385304575             | 1                                         | nd       | nd     | nd     | nd     | nd     | nd     | nd     | nd     | nd     | nd     | d      |
| ubc6p                                                                                 | 385305161             | 2                                         | nd       | nd     | nd     | nd     | nd     | nd     | d      | nd     | nd     | nd     | d      |
| secretion lowering protein                                                            | 385306034             | 1                                         | nd       | nd     | nd     | nd     | nd     | nd     | nd     | d      | nd     | nd     | nd     |
| specificity factor required for Rsp5p-dependent ubiquitination                        | 385305160             | 2                                         | nd       | d      | nd     | nd     | d      | nd     | nd     | nd     | nd     | nd     | nd     |
| cytosolic j-domain-containing protein                                                 | 385304952             | 1                                         | nd       | nd     | nd     | nd     | nd     | nd     | nd     | d      | nd     | nd     | nd     |
| 60s acidic ribosomal protein p0                                                       | 385305504             | 2                                         | d        | nd     | nd     | nd     | d      | nd     | nd     | nd     | nd     | nd     | nd     |
| putative u3 snornc protein utp6p                                                      | 385303749             | 1                                         | nd       | nd     | d      | nd     | nd     | nd     | nd     | nd     | nd     | nd     | nd     |
| protein mitochondrial precursor coq6p                                                 | 385304901             | 1                                         | nd       | d      | nd     | nd     | nd     | nd     | nd     | nd     | nd     | nd     | nd     |
| putative g2 b-type cyclin                                                             | 385301545             | 1                                         | nd       | nd     | nd     | nd     | nd     | nd     | nd     | nd     | d      | nd     | nd     |
| glutathione synthetase                                                                | 385301298             | 1                                         | nd       | nd     | nd     | nd     | nd     | nd     | nd     | nd     | d      | nd     | nd     |
| histone H3                                                                            | 385304656             | 1                                         | d        | nd     | nd     | nd     | nd     | nd     | nd     | nd     | nd     | nd     | nd     |
| putative regulator of cell polarity component of the rsc chromatin remodeling complex | 385301531             | 1                                         | nd       | nd     | nd     | nd     | nd     | d      | nd     | nd     | nd     | nd     | nd     |
|                                                                                       | 385303878             | 1                                         | nd       | nd     | nd     | nd     | nd     | d      | nd     | nd     | nd     | nd     | nd     |
|                                                                                       | 385301599             | 1                                         | nd       | nd     | nd     | nd     | nd     | nd     | nd     | nd     | nd     | nd     | d      |
|                                                                                       | 385301587             | 1                                         | nd       | nd     | nd     | d      | nd     | nd     | nd     | nd     | nd     | nd     | nd     |

# Supplemental Data for:

Križanović S, Gracin L, Cindrić M, Tomašević M, Kelšin K, Lukić K and Kovačević Ganić K.

Comparison of proteomic, metabolic, and growth profiles of *Brettanomyces bruxellensis* isolates from Croatian wines.

Am J Enol Vitic 70:77-87. doi: 10.5344/ajev.2018.18025

**Supplemental Table 2 (continued)** List of proteins expressed in the tested *Brettanomyces bruxellensis* isolates and the reference strain.

| Protein name                                                                         | NCBI accession number | No. of tested isolates expressing protein | Isolate  |        |        |        |        |        |        |        |        |        |        |
|--------------------------------------------------------------------------------------|-----------------------|-------------------------------------------|----------|--------|--------|--------|--------|--------|--------|--------|--------|--------|--------|
|                                                                                      |                       |                                           | CBS 2499 | KLV 11 | KLV 13 | KLV 14 | KLV 15 | KLV 16 | KLV 17 | KLV 18 | KLV 19 | KLV 21 | KLV 22 |
| eukaryotic initiation factor 4a                                                      | 385304324             | 2                                         | nd       | nd     | nd     | nd     | nd     | d      | nd     | d      | nd     | nd     | nd     |
| subunit of cleavage polyadenylation factor                                           | 385301071             | 1                                         | nd       | nd     | nd     | nd     | nd     | nd     | nd     | d      | nd     | nd     | nd     |
| rho-type GTPase-activating protein                                                   | 385301143             | 1                                         | nd       | nd     | nd     | d      | nd     | nd     | nd     | nd     | nd     | nd     | nd     |
| basic leucine zipper transcription factor of the atf creb activates transcription of | 385302299             | 1                                         | nd       | nd     | nd     | nd     | nd     | nd     | nd     | nd     | nd     | nd     | d      |
| co-chaperone that stimulates the ATPase activity of the hsp70 protein ssc1p          | 385304889             | 1                                         | nd       | nd     | nd     | nd     | nd     | nd     | nd     | d      | nd     | nd     | nd     |
| isomaltase                                                                           | 385301605             | 1                                         | nd       | nd     | nd     | nd     | nd     | d      | nd     | nd     | nd     | nd     | nd     |
| putative p-nitrophenyl phosphatase                                                   | 385302526             | 1                                         | nd       | nd     | nd     | nd     | nd     | nd     | d      | nd     | nd     | nd     | nd     |
| putative intra-golgi transport complex subunit 8                                     | 385301418             | 2                                         | nd       | nd     | nd     | d      | d      | nd     | nd     | nd     | nd     | nd     | nd     |
| NADPH-dependent medium chain alcohol dehydrogenase with broad substrate specificity  | 385305880             | 1                                         | nd       | nd     | nd     | nd     | nd     | nd     | d      | nd     | nd     | nd     | nd     |
| serine mitochondrial precursor                                                       | 385305298             | 1                                         | nd       | nd     | nd     | nd     | nd     | nd     | nd     | nd     | d      | nd     | nd     |
| hypothetical protein AWRI1499_3184                                                   | 385302819             | 1                                         | nd       | nd     | nd     | nd     | nd     | nd     | nd     | nd     | nd     | nd     | d      |
| ylr326w-like protein                                                                 | 385306046             | 1                                         | nd       | nd     | nd     | nd     | nd     | nd     | nd     | nd     | nd     | d      | nd     |
| 3-phosphoglycerate dehydrogenase                                                     | 385302510             | 4                                         | nd       | nd     | d      | d      | nd     | nd     | nd     | nd     | nd     | d      | d      |
| hypothetical protein AWRI1499_4583                                                   | 385301367             | 1                                         | nd       | nd     | d      | nd     | nd     | nd     | nd     | nd     | nd     | nd     | nd     |
| hypothetical protein AWRI1499_3908                                                   | 385302033             | 2                                         | nd       | nd     | nd     | nd     | d      | nd     | nd     | nd     | nd     | nd     | d      |
| mitochondrial peroxiredoxin prx1                                                     | 385304076             | 10                                        | d        | d      | d      | d      | d      | nd     | d      | d      | d      | d      | d      |
| heat shock protein 104                                                               | 385303591             | 1                                         | nd       | nd     | nd     | nd     | nd     | nd     | nd     | nd     | nd     | d      | nd     |
| largest subunit of the origin recognition complex                                    | 385302985             | 1                                         | nd       | nd     | nd     | nd     | nd     | nd     | d      | nd     | nd     | nd     | nd     |
| filament-forming protein                                                             | 385301164             | 1                                         | nd       | nd     | d      | nd     | nd     | nd     | nd     | nd     | nd     | nd     | nd     |
| 26s protease regulatory subunit 7                                                    | 385302411             | 3                                         | nd       | nd     | d      | nd     | nd     | nd     | nd     | nd     | d      | d      | nd     |
| fad-linked sulfhydryl oxidase mitochondrial precursor                                | 385303167             | 1                                         | nd       | nd     | nd     | nd     | nd     | nd     | nd     | nd     | nd     | d      | nd     |
| DNA replication licensing factor mcm3                                                | 385303725             | 1                                         | nd       | nd     | nd     | nd     | nd     | nd     | d      | nd     | nd     | nd     | nd     |
| ribosomal large                                                                      | 385304635             | 2                                         | nd       | nd     | nd     | d      | nd     | nd     | nd     | nd     | nd     | nd     | d      |
| condensin complex component cnd2                                                     | 385305228             | 1                                         | nd       | d      | nd     | nd     | nd     | nd     | nd     | nd     | nd     | nd     | nd     |
| eukaryotic translation initiation factor 2 gamma subunit                             | 385305346             | 1                                         | nd       | nd     | nd     | d      | nd     | nd     | nd     | nd     | nd     | nd     | nd     |
| bleomycin resistance                                                                 | 385303650             | 1                                         | nd       | nd     | d      | nd     | nd     | nd     | nd     | nd     | nd     | nd     | nd     |
| splicing factor 3b subunit                                                           | 385304589             | 1                                         | nd       | nd     | nd     | d      | nd     | nd     | nd     | nd     | nd     | nd     | nd     |
| 60s ribosomal protein l25                                                            | 385303433             | 3                                         | nd       | nd     | nd     | d      | d      | nd     | nd     | nd     | nd     | nd     | d      |
| sporulation specific protein that localizes to the spore wall                        | 385301232             | 1                                         | nd       | nd     | nd     | nd     | d      | nd     | nd     | nd     | nd     | nd     | nd     |
| fad synthetase                                                                       | 385304785             | 1                                         | nd       | nd     | nd     | nd     | nd     | nd     | nd     | nd     | d      | nd     | nd     |
| sso2p                                                                                | 385303991             | 1                                         | nd       | nd     | nd     | nd     | nd     | nd     | nd     | nd     | nd     | d      | nd     |
| nucleosome binding protein                                                           | 385302209             | 1                                         | d        | nd     | nd     | nd     | nd     | nd     | nd     | nd     | nd     | nd     | nd     |
| putative transmembrane protein                                                       | 385301466             | 1                                         | d        | nd     | nd     | nd     | nd     | nd     | nd     | nd     | nd     | nd     | nd     |
| ubiquitin-specific protease                                                          | 385302493             | 3                                         | nd       | nd     | nd     | nd     | nd     | nd     | nd     | nd     | nd     | d      | d      |
| membrane dipeptidase                                                                 | 385301635             | 2                                         | d        | d      | nd     | nd     | nd     | nd     | nd     | nd     | nd     | nd     | nd     |
| aim41-like protein                                                                   | 385301702             | 1                                         | nd       | nd     | nd     | nd     | nd     | nd     | nd     | nd     | nd     | nd     | d      |
| ylr253w-like protein                                                                 | 385301873             | 1                                         | d        | nd     | nd     | nd     | nd     | nd     | nd     | nd     | nd     | nd     | nd     |
| NADPH reductase                                                                      | 385302245             | 1                                         | nd       | nd     | nd     | nd     | d      | nd     | nd     | nd     | nd     | nd     | nd     |
| dolichol kinase                                                                      | 385303918             | 1                                         | nd       | nd     | nd     | nd     | nd     | nd     | d      | nd     | nd     | nd     | nd     |
| ygr017w-like protein                                                                 | 385304967             | 1                                         | d        | nd     | nd     | nd     | nd     | nd     | nd     | nd     | nd     | nd     | nd     |

# Supplemental Data for:

Križanović S, Gracin L, Cindrić M, Tomašević M, Kelšin K, Lukić K and Kovačević Ganić K.

Comparison of proteomic, metabolic, and growth profiles of *Brettanomyces bruxellensis* isolates from Croatian wines.

Am J Enol Vitic 70:77-87. doi: 10.5344/ajev.2018.18025

**Supplemental Table 2 (continued)** List of proteins expressed in the tested *Brettanomyces bruxellensis* isolates and the reference strain.

| Protein name                                                       | NCBI accession number | No. of tested isolates expressing protein | Isolate  |        |        |        |        |        |        |        |        |        |        |
|--------------------------------------------------------------------|-----------------------|-------------------------------------------|----------|--------|--------|--------|--------|--------|--------|--------|--------|--------|--------|
|                                                                    |                       |                                           | CBS 2499 | KLV 11 | KLV 13 | KLV 14 | KLV 15 | KLV 16 | KLV 17 | KLV 18 | KLV 19 | KLV 21 | KLV 22 |
| TFIIE small involved in RNA polymerase II transcription initiation | 385304451             | 1                                         | nd       | nd     | nd     | nd     | nd     | nd     | nd     | nd     | d      | nd     | nd     |
| cytokinesis protein sepa                                           | 385305703             | 1                                         | nd       | nd     | nd     | nd     | nd     | nd     | nd     | nd     | nd     | nd     | d      |
| hypothetical protein AWRI1499_4537                                 | 385301430             | 1                                         | nd       | nd     | nd     | nd     | d      | nd     | nd     | nd     | nd     | nd     | nd     |
| nrp1p                                                              | 385302034             | 2                                         | nd       | nd     | nd     | nd     | nd     | nd     | d      | nd     | nd     | nd     | d      |
| capsule synthesis                                                  | 385300918             | 1                                         | nd       | nd     | nd     | nd     | nd     | d      | nd     | nd     | nd     | nd     | nd     |
| 50s ribosomal protein l17                                          | 385303260             | 2                                         | nd       | nd     | d      | nd     | nd     | nd     | nd     | d      | nd     | nd     | nd     |
| ATP-dependent RNA helicase dbp9 (dead-box protein 9)               | 385305572             | 3                                         | nd       | nd     | nd     | d      | nd     | nd     | nd     | nd     | d      | d      | nd     |
| conserved fungal protein cfp1                                      | 385302759             | 2                                         | d        | nd     | d      | nd     | nd     | nd     | nd     | nd     | nd     | nd     | nd     |
| exocyst complex component exo84                                    | 385303364             | 1                                         | nd       | nd     | d      | nd     | nd     | nd     | nd     | nd     | nd     | nd     | nd     |
| nuclear pore protein involved in nuclear export of pre-tRNA        | 385304686             | 1                                         | nd       | nd     | d      | nd     | nd     | nd     | nd     | nd     | nd     | nd     | nd     |
| tgf beta-inducible nuclear protein 1                               | 385303895             | 3                                         | nd       | nd     | nd     | d      | nd     | nd     | d      | nd     | nd     | d      | nd     |
| hypothetical protein AWRI1499_1007                                 | 385305061             | 1                                         | nd       | nd     | nd     | nd     | nd     | nd     | nd     | nd     | nd     | d      | nd     |
| putative RNA polymerase I and III shared subunit rpb19             | 385301731             | 1                                         | nd       | nd     | nd     | nd     | nd     | nd     | nd     | nd     | d      | nd     | nd     |
| acid phosphatase                                                   | 385301638             | 1                                         | nd       | nd     | nd     | d      | nd     | nd     | nd     | nd     | nd     | nd     | nd     |
| saccharopine dehydrogenase                                         | 385303734             | 1                                         | nd       | nd     | nd     | d      | nd     | nd     | nd     | nd     | nd     | nd     | nd     |
| cdc11p                                                             | 385301481             | 2                                         | nd       | nd     | d      | nd     | nd     | d      | nd     | nd     | nd     | nd     | nd     |
| hypothetical protein AWRI1499_3333                                 | 385302665             | 1                                         | nd       | nd     | nd     | nd     | nd     | nd     | nd     | nd     | d      | nd     | nd     |
| 60s ribosomal protein l10a                                         | 385304721             | 2                                         | nd       | nd     | nd     | nd     | nd     | d      | nd     | d      | nd     | nd     | nd     |
| fpr1p                                                              | 385303578             | 9                                         | nd       | d      | d      | d      | d      | d      | d      | nd     | d      | d      | d      |
| ubiquitin c-terminal hydrolase family protein                      | 385305698             | 1                                         | nd       | nd     | nd     | nd     | d      | nd     | nd     | nd     | nd     | nd     | nd     |
| protein along with and for synthesis of diphthamide                | 385305769             | 1                                         | nd       | nd     | nd     | d      | nd     | nd     | nd     | nd     | nd     | nd     | nd     |
| rho GTPase activating protein                                      | 385304352             | 1                                         | nd       | nd     | nd     | d      | nd     | nd     | nd     | nd     | nd     | nd     | nd     |
| fad transporter                                                    | 385302475             | 2                                         | d        | nd     | nd     | d      | nd     | nd     | nd     | nd     | nd     | nd     | nd     |
| hypothetical protein AWRI1499_3644                                 | 385302352             | 1                                         | nd       | nd     | nd     | nd     | nd     | d      | nd     | nd     | nd     | nd     | nd     |
| protein component of the large ribosomal subunit                   | 385302847             | 1                                         | nd       | nd     | nd     | d      | nd     | nd     | nd     | nd     | nd     | nd     | nd     |
| prohibitin-like protein                                            | 385302062             | 1                                         | nd       | nd     | nd     | nd     | nd     | nd     | nd     | nd     | d      | nd     | nd     |
| GTP binding elongation factor 1 alpha-like protein                 | 385301958             | 2                                         | nd       | nd     | nd     | nd     | nd     | nd     | nd     | d      | d      | nd     | nd     |
| camp-dependent protein kinase regulatory subunit                   | 385302590             | 1                                         | nd       | d      | nd     | nd     | nd     | nd     | nd     | nd     | nd     | nd     | nd     |
| chromatin assembly subunit p90                                     | 385305037             | 3                                         | nd       | d      | nd     | nd     | nd     | nd     | d      | d      | nd     | nd     | nd     |
| tye7p                                                              | 385301302             | 1                                         | nd       | nd     | nd     | nd     | nd     | nd     | nd     | d      | nd     | nd     | nd     |
| cell division control protein 68                                   | 385303218             | 1                                         | d        | nd     | nd     | nd     | nd     | nd     | nd     | nd     | nd     | nd     | nd     |
| seryl-tRNA synthetase                                              | 385302569             | 4                                         | d        | nd     | nd     | nd     | d      | nd     | nd     | d      | d      | nd     | nd     |
| hypothetical protein AWRI1499_1406                                 | 385304672             | 2                                         | nd       | nd     | nd     | nd     | d      | nd     | nd     | d      | nd     | nd     | nd     |
| glucose-6-phosphate isomerase                                      | 385303252             | 8                                         | nd       | d      | d      | d      | d      | d      | d      | d      | nd     | d      | nd     |
| 20s cyclosome subunit ( nuc2 cdc27)                                | 385306069             | 1                                         | nd       | nd     | d      | nd     | nd     | nd     | nd     | nd     | nd     | nd     | nd     |
| hypothetical protein AWRI1499_2619                                 | 385303391             | 1                                         | nd       | nd     | nd     | nd     | nd     | nd     | nd     | d      | nd     | nd     | nd     |
| protein kinase c                                                   | 385301395             | 1                                         | nd       | nd     | nd     | nd     | nd     | d      | nd     | nd     | nd     | nd     | nd     |
| hypothetical protein AWRI1499_3418                                 | 385302581             | 1                                         | d        | nd     | nd     | nd     | nd     | nd     | nd     | nd     | nd     | nd     | nd     |
| carboxypeptidase y                                                 | 385301734             | 5                                         | nd       | d      | nd     | d      | nd     | d      | d      | nd     | nd     | nd     | nd     |
| ysr3p                                                              | 385302212             | 2                                         | nd       | nd     | d      | d      | nd     | nd     | nd     | nd     | nd     | nd     | nd     |
| constituent of pre-ribosomal ribosomal biogenesis                  | 385305629             | 1                                         | nd       | nd     | nd     | nd     | nd     | nd     | nd     | nd     | nd     | d      | nd     |

# Supplemental Data for:

Križanović S, Gracin L, Cindrić M, Tomašević M, Kelšin K, Lukić K and Kovačević Ganić K.

Comparison of proteomic, metabolic, and growth profiles of *Brettanomyces bruxellensis* isolates from Croatian wines.

Am J Enol Vitic 70:77-87. doi: 10.5344/ajev.2018.18025

**Supplemental Table 2 (continued)** List of proteins expressed in the tested *Brettanomyces bruxellensis* isolates and the reference strain.

| Protein name                                                                          | NCBI accession number | No. of tested isolates expressing protein | Isolate  |        |        |        |        |        |        |        |        |        |        |
|---------------------------------------------------------------------------------------|-----------------------|-------------------------------------------|----------|--------|--------|--------|--------|--------|--------|--------|--------|--------|--------|
|                                                                                       |                       |                                           | CBS 2499 | KLV 11 | KLV 13 | KLV 14 | KLV 15 | KLV 16 | KLV 17 | KLV 18 | KLV 19 | KLV 21 | KLV 22 |
| uracil phosphoribosyltransferase                                                      | 385304877             | 1                                         | nd       | nd     | nd     | d      | nd     | nd     | nd     | nd     | nd     | nd     | nd     |
| transcription elongation factor                                                       | 385303679             | 2                                         | nd       | nd     | nd     | nd     | nd     | nd     | nd     | d      | nd     | nd     | d      |
| nedd8-activating enzyme e1 regulatory catalytic subunit of 1,3-beta-D-glucan synthase | 385301490             | 1                                         | nd       | nd     | d      | nd     | nd     | nd     | nd     | nd     | nd     | nd     | nd     |
| hypothetical protein AWRI1499_4127                                                    | 385301853             | 1                                         | nd       | nd     | nd     | d      | nd     | nd     | nd     | nd     | nd     | nd     | nd     |
| rsc58p                                                                                | 385305073             | 2                                         | nd       | nd     | d      | nd     | nd     | nd     | nd     | nd     | nd     | nd     | d      |
| hypothetical protein AWRI1499_4943                                                    | 385300941             | 1                                         | nd       | nd     | nd     | nd     | nd     | nd     | nd     | nd     | d      | nd     | nd     |
| putative t-snare-interacting protein sly1p                                            | 385302778             | 1                                         | nd       | nd     | nd     | nd     | nd     | nd     | nd     | nd     | d      | nd     | nd     |
| hypothetical protein AWRI1499_4148                                                    | 385301814             | 1                                         | nd       | nd     | nd     | nd     | nd     | nd     | nd     | nd     | nd     | d      | nd     |
| aaa family                                                                            | 385304642             | 2                                         | nd       | nd     | d      | nd     | nd     | nd     | nd     | nd     | nd     | nd     | d      |
| mls1                                                                                  | 385305057             | 4                                         | d        | nd     | nd     | d      | d      | nd     | nd     | nd     | nd     | d      | nd     |
| endosomal p24a protein precursor                                                      | 385303928             | 1                                         | nd       | nd     | nd     | nd     | d      | nd     | nd     | nd     | nd     | nd     | nd     |
| nuclear migration                                                                     | 385302052             | 1                                         | nd       | nd     | nd     | nd     | nd     | nd     | nd     | nd     | nd     | d      | nd     |
| pre-mRNA splicing factor ATP-dependent RNA helicase prp43                             | 385303418             | 2                                         | d        | nd     | d      | nd     | nd     | nd     | nd     | nd     | nd     | nd     | nd     |
| nop13p                                                                                | 385301669             | 1                                         | nd       | d      | nd     | nd     | nd     | nd     | nd     | nd     | nd     | nd     | nd     |
| histidinol dehydrogenase                                                              | 385303314             | 1                                         | nd       | nd     | nd     | nd     | d      | nd     | nd     | nd     | nd     | nd     | nd     |
| myosin-like protein associated with the nuclear envelope                              | 385301165             | 1                                         | nd       | nd     | nd     | nd     | nd     | nd     | nd     | nd     | nd     | nd     | d      |
| 60s ribosomal protein l13                                                             | 385302521             | 2                                         | nd       | nd     | nd     | nd     | nd     | d      | nd     | d      | nd     | nd     | nd     |
| ccr4-not transcription subunit 3                                                      | 385302321             | 1                                         | nd       | nd     | nd     | nd     | nd     | nd     | d      | nd     | nd     | nd     | nd     |
| 6-Phosphogluconate dehydrogenase                                                      | 385305854             | 1                                         | nd       | d      | nd     | nd     | nd     | nd     | nd     | nd     | nd     | nd     | nd     |
| tRNA pseudouridine synthase                                                           | 385304790             | 1                                         | nd       | nd     | nd     | d      | nd     | nd     | nd     | nd     | nd     | nd     | nd     |
| NII2P-like, possibly involved in nitrite transport                                    | 385305267             | 1                                         | nd       | nd     | nd     | nd     | nd     | nd     | nd     | nd     | nd     | nd     | d      |
| anaerobic ribonucleoside-triphosphate reductase                                       | 385302266             | 1                                         | nd       | nd     | nd     | nd     | nd     | nd     | d      | nd     | nd     | nd     | nd     |
| DEHA2G18788p-like protein                                                             | 385301686             | 1                                         | nd       | nd     | nd     | nd     | nd     | nd     | nd     | nd     | d      | nd     | nd     |
| 60s ribosomal protein l10                                                             | 385301352             | 9                                         | d        | d      | d      | d      | d      | nd     | d      | d      | nd     | d      | d      |
| bud site selection protein                                                            | 385303764             | 1                                         | nd       | nd     | nd     | nd     | nd     | nd     | nd     | d      | nd     | nd     | nd     |
| udp-glucose:sterol glucosyltransferase                                                | 385301329             | 1                                         | nd       | nd     | d      | nd     | nd     | nd     | nd     | nd     | nd     | nd     | nd     |
| serine threonine-protein kinase kin28                                                 | 385304951             | 1                                         | nd       | nd     | nd     | d      | nd     | nd     | nd     | nd     | nd     | nd     | nd     |
| hypothetical protein AWRI1499_4108                                                    | 385301834             | 1                                         | nd       | d      | nd     | nd     | nd     | nd     | nd     | nd     | nd     | nd     | nd     |
| amp deaminase                                                                         | 385301708             | 1                                         | nd       | nd     | nd     | nd     | nd     | nd     | nd     | d      | nd     | nd     | nd     |
| hypothetical protein AWRI1499_2574                                                    | 385303454             | 1                                         | d        | nd     | nd     | nd     | nd     | nd     | nd     | nd     | nd     | nd     | nd     |
| mitochondrial outer membrane protein involved in mitochondrial shape                  | 385305466             | 1                                         | nd       | nd     | nd     | d      | nd     | nd     | nd     | nd     | nd     | nd     | nd     |
| actin                                                                                 | 385303856             | 7                                         | nd       | nd     | nd     | d      | nd     | d      | nd     | d      | d      | d      | d      |
| vacuolar protein sorting vps16                                                        | 385305085             | 1                                         | nd       | nd     | nd     | nd     | d      | nd     | nd     | nd     | nd     | nd     | nd     |
| rml2p                                                                                 | 385305909             | 2                                         | nd       | nd     | nd     | nd     | nd     | nd     | nd     | d      | nd     | nd     | d      |
| hypothetical protein AWRI1499_2408                                                    | 385303552             | 1                                         | nd       | nd     | nd     | nd     | nd     | d      | nd     | nd     | nd     | nd     | nd     |
| putative sulfate transporter                                                          | 385305602             | 1                                         | nd       | nd     | nd     | d      | nd     | nd     | nd     | nd     | nd     | nd     | nd     |
| tRNA-dihydrouridine synthase 2                                                        | 385303832             | 2                                         | nd       | nd     | nd     | nd     | nd     | d      | nd     | nd     | d      | nd     | nd     |
| GTP-binding nuclear protein gsp1 ran                                                  | 385305414             | 1                                         | nd       | nd     | nd     | nd     | nd     | nd     | nd     | nd     | nd     | nd     | d      |
| ada histone acetyltransferase complex component                                       | 385301062             | 1                                         | nd       | nd     | nd     | nd     | nd     | nd     | nd     | nd     | d      | nd     | nd     |
| glutamate decarboxylase                                                               | 385303979             | 1                                         | nd       | nd     | nd     | nd     | nd     | nd     | nd     | d      | nd     | nd     | nd     |
| yhr131c-like protein                                                                  | 385305603             | 1                                         | nd       | nd     | nd     | nd     | d      | nd     | nd     | nd     | nd     | nd     | nd     |

# Supplemental Data for:

Križanović S, Gracin L, Cindrić M, Tomašević M, Kelšin K, Lukić K and Kovačević Ganić K.

Comparison of proteomic, metabolic, and growth profiles of *Brettanomyces bruxellensis* isolates from Croatian wines.

Am J Enol Vitic 70:77-87. doi: 10.5344/ajev.2018.18025

**Supplemental Table 2 (continued)** List of proteins expressed in the tested *Brettanomyces bruxellensis* isolates and the reference strain.

| Protein name                                                                   | NCBI accession number | No. of tested isolates expressing protein | Isolate  |        |        |        |        |        |        |        |        |        |        |
|--------------------------------------------------------------------------------|-----------------------|-------------------------------------------|----------|--------|--------|--------|--------|--------|--------|--------|--------|--------|--------|
|                                                                                |                       |                                           | CBS 2499 | KLV 11 | KLV 13 | KLV 14 | KLV 15 | KLV 16 | KLV 17 | KLV 18 | KLV 19 | KLV 21 | KLV 22 |
| part of small ribosomal subunit processosome (contains u3 snoRNA)              | 385305108             | 1                                         | nd       | nd     | nd     | nd     | nd     | d      | nd     | nd     | nd     | nd     | nd     |
| homocitrate mitochondrial precursor                                            | 385304058             | 1                                         | nd       | nd     | nd     | nd     | nd     | d      | nd     | nd     | nd     | nd     | nd     |
| acetoxyhydroxyacid reductoisomerase                                            | 385304108             | 1                                         | nd       | nd     | nd     | nd     | nd     | d      | nd     | nd     | nd     | nd     | nd     |
| uracil-DNA glycosylase                                                         | 385304682             | 1                                         | nd       | nd     | nd     | d      | nd     | nd     | nd     | nd     | nd     | nd     | nd     |
| rnp-1 like RNA-binding protein                                                 | 385304547             | 1                                         | nd       | nd     | nd     | nd     | nd     | nd     | nd     | nd     | nd     | d      | nd     |
| lactate transporter                                                            | 385301864             | 1                                         | nd       | nd     | nd     | nd     | nd     | nd     | nd     | d      | nd     | nd     | nd     |
| activator 1 40 kDa subunit                                                     | 385302248             | 2                                         | d        | nd     | nd     | nd     | d      | nd     | nd     | nd     | nd     | nd     | nd     |
| protein snq2                                                                   | 385303511             | 2                                         | nd       | nd     | nd     | nd     | d      | nd     | d      | nd     | nd     | nd     | nd     |
| phenylalanyl-tRNA mitochondrial precursor                                      | 385302246             | 1                                         | nd       | nd     | nd     | nd     | nd     | nd     | nd     | d      | nd     | nd     | nd     |
| mitochondrial ATP-dependent RNA helicase of the dead-box family                | 385304792             | 1                                         | nd       | nd     | nd     | nd     | nd     | nd     | d      | nd     | nd     | nd     | nd     |
| protein phosphatase                                                            | 385304689             | 2                                         | nd       | nd     | nd     | nd     | nd     | nd     | nd     | nd     | d      | nd     | d      |
| protein phosphatase 2a regulatory b subunit                                    | 385305225             | 1                                         | nd       | nd     | nd     | nd     | nd     | nd     | d      | nd     | nd     | nd     | nd     |
| aldose reductase                                                               | 385305632             | 1                                         | nd       | nd     | d      | nd     | nd     | nd     | nd     | nd     | nd     | nd     | nd     |
| aromatic amino acid aminotransferase                                           | 385302588             | 1                                         | nd       | nd     | nd     | nd     | nd     | nd     | nd     | nd     | d      | nd     | nd     |
| kinesin-related motor                                                          | 385301160             | 1                                         | nd       | nd     | nd     | nd     | d      | nd     | nd     | nd     | nd     | nd     | nd     |
| mitochondrial cytochrome                                                       | 385301477             | 1                                         | nd       | nd     | nd     | nd     | d      | nd     | nd     | nd     | nd     | nd     | nd     |
| 40s ribosomal protein s20                                                      | 385302444             | 8                                         | d        | nd     | d      | d      | d      | d      | d      | d      | nd     | nd     | d      |
| translation elongation factor 2                                                | 385301947             | 2                                         | nd       | nd     | d      | nd     | d      | nd     | nd     | nd     | nd     | nd     | nd     |
| ATPase-stabilizing factor 15 kDa protein                                       | 385301674             | 4                                         | d        | d      | nd     | nd     | nd     | nd     | nd     | nd     | d      | d      | nd     |
| putative mRNA deadenylase and ccr4-not complex subunit cdc36p                  | 385305828             | 1                                         | nd       | nd     | nd     | nd     | nd     | nd     | nd     | nd     | d      | nd     | nd     |
| RNA lariat debranching enzyme                                                  | 385302419             | 1                                         | nd       | nd     | nd     | nd     | nd     | nd     | nd     | d      | nd     | nd     | nd     |
| acetyl- propionyl-coenzyme a carboxylase alpha chain                           | 385304298             | 3                                         | nd       | d      | d      | nd     | nd     | nd     | nd     | nd     | nd     | d      | nd     |
| dihydrolipoamide acetyltransferase component of pyruvate dehydrogenase complex | 385304048             | 1                                         | nd       | nd     | nd     | nd     | nd     | nd     | nd     | d      | nd     | nd     | nd     |
| effector of rab GTPase forms a complex with sec4p and t-snare sec9p            | 385304461             | 1                                         | nd       | nd     | d      | nd     | nd     | nd     | nd     | nd     | nd     | nd     | nd     |
| ymr066w-like protein                                                           | 385301689             | 1                                         | nd       | nd     | nd     | nd     | nd     | d      | nd     | nd     | nd     | nd     | nd     |
| ppz1p                                                                          | 385301181             | 1                                         | nd       | d      | nd     | nd     | nd     | nd     | nd     | nd     | nd     | nd     | nd     |
| beta-isopropylmalate dehydrogenase                                             | 385304858             | 2                                         | nd       | nd     | nd     | d      | nd     | nd     | nd     | nd     | nd     | nd     | d      |
| tRNA (5-methylaminomethyl-2-thiouridylate)-methyltransferase                   | 385304332             | 1                                         | nd       | nd     | nd     | nd     | d      | nd     | nd     | nd     | nd     | nd     | nd     |
| putative u3 snornc protein utp20p                                              | 385302639             | 1                                         | nd       | nd     | nd     | nd     | nd     | nd     | nd     | nd     | d      | nd     | nd     |
| methylthio-ribulose-1-phosphate dehydratase                                    | 385304671             | 1                                         | nd       | nd     | nd     | nd     | nd     | nd     | nd     | d      | nd     | nd     | nd     |
| 40s ribosomal protein s10                                                      | 385303039             | 1                                         | nd       | nd     | nd     | nd     | d      | nd     | nd     | nd     | nd     | nd     | nd     |
| GTPase-activating protein                                                      | 385305120             | 1                                         | nd       | nd     | nd     | nd     | d      | nd     | nd     | nd     | nd     | nd     | nd     |
| adhesion and aggregation factor                                                | 385304851             | 1                                         | nd       | nd     | nd     | nd     | d      | nd     | nd     | nd     | nd     | nd     | nd     |
| acetylornithine deacetylase                                                    | 385305065             | 1                                         | nd       | nd     | nd     | nd     | nd     | nd     | nd     | nd     | nd     | nd     | d      |
| 40s ribosomal protein s7-a                                                     | 385302105             | 1                                         | nd       | nd     | d      | nd     | nd     | nd     | nd     | nd     | nd     | nd     | nd     |
| o-methyltransferase                                                            | 385305850             | 1                                         | nd       | nd     | nd     | nd     | nd     | d      | nd     | nd     | nd     | nd     | nd     |
| diadenosine 5' - tetraphosphate phosphorylase II (ap4a phosphorylase)          | 385301394             | 1                                         | nd       | nd     | nd     | nd     | nd     | nd     | d      | nd     | nd     | nd     | nd     |
| ras GTPase activating                                                          | 385302786             | 1                                         | nd       | nd     | nd     | nd     | nd     | nd     | nd     | d      | nd     | nd     | nd     |
| phosphatidylinositol 4-kinase                                                  | 385303594             | 1                                         | nd       | nd     | nd     | nd     | nd     | nd     | nd     | nd     | nd     | d      | nd     |



# Supplemental Data for:

Križanović S, Gracin L, Cindrić M, Tomašević M, Kelšin K, Lukić K and Kovačević Ganić K.

Comparison of proteomic, metabolic, and growth profiles of *Brettanomyces bruxellensis* isolates from Croatian wines.

Am J Enol Vitic 70:77-87. doi: 10.5344/ajev.2018.18025

**Supplemental Table 2 (continued)** List of proteins expressed in the tested *Brettanomyces bruxellensis* isolates and the reference strain.

| Protein name                                                      | NCBI accession number | No. of tested isolates expressing protein | Isolate  |        |        |        |        |        |        |        |        |        |        |
|-------------------------------------------------------------------|-----------------------|-------------------------------------------|----------|--------|--------|--------|--------|--------|--------|--------|--------|--------|--------|
|                                                                   |                       |                                           | CBS 2499 | KLV 11 | KLV 13 | KLV 14 | KLV 15 | KLV 16 | KLV 17 | KLV 18 | KLV 19 | KLV 21 | KLV 22 |
| putative translation-regulating helicase                          | 385304705             | 1                                         | nd       | nd     | nd     | d      | nd     | nd     | nd     | nd     | nd     | nd     | nd     |
| protein disulfide isomerase                                       | 385303126             | 6                                         | d        | nd     | d      | d      | d      | d      | nd     | nd     | nd     | d      | nd     |
| pep12p                                                            | 385302300             | 1                                         | nd       | nd     | nd     | d      | nd     | nd     | nd     | nd     | nd     | nd     | nd     |
| carnitine acetyltransferase                                       | 385305337             | 1                                         | nd       | nd     | nd     | nd     | nd     | nd     | nd     | nd     | nd     | d      | nd     |
| mRNA splicing protein                                             | 385306095             | 2                                         | nd       | nd     | nd     | nd     | nd     | d      | d      | nd     | nd     | nd     | nd     |
| beta-galactosidase                                                | 385301016             | 1                                         | nd       | nd     | nd     | nd     | nd     | nd     | nd     | d      | nd     | nd     | nd     |
| 60s ribosomal protein l7                                          | 385304857             | 5                                         | nd       | nd     | nd     | d      | d      | d      | nd     | nd     | d      | nd     | d      |
| putative compass histone methyltransferase subunit set1p          | 385305977             | 1                                         | d        | nd     | nd     | nd     | nd     | nd     | nd     | nd     | nd     | nd     | nd     |
| RNA binding domain-containing protein                             | 385303131             | 1                                         | nd       | d      | nd     | nd     | nd     | nd     | nd     | nd     | nd     | nd     | nd     |
| saga-associated factor 11                                         | 385304022             | 1                                         | nd       | nd     | nd     | nd     | nd     | nd     | nd     | nd     | nd     | d      | nd     |
| hypothetical protein AWRI1499_4359                                | 385301613             | 1                                         | nd       | nd     | nd     | nd     | nd     | nd     | nd     | nd     | nd     | d      | nd     |
| pyridoxal reductase                                               | 385305537             | 1                                         | nd       | nd     | nd     | nd     | nd     | nd     | d      | nd     | nd     | nd     | nd     |
| putative tea atts type DNA binding protein                        | 385304599             | 1                                         | nd       | nd     | nd     | nd     | nd     | nd     | nd     | d      | nd     | nd     | nd     |
| 60s ribosomal protein l44                                         | 385305606             | 9                                         | nd       | d      | d      | d      | d      | d      | d      | d      | d      | d      | nd     |
| gex interacting protein family member (gei-17)                    | 385304061             | 1                                         | nd       | nd     | nd     | nd     | nd     | nd     | nd     | nd     | nd     | d      | nd     |
| formin (bud-site selection polarity protein)                      | 385305815             | 3                                         | nd       | d      | nd     | nd     | nd     | d      | nd     | nd     | nd     | d      | nd     |
| phosphoribosylformylglycinamide cyclo-ligase                      | 385301826             | 1                                         | nd       | nd     | nd     | nd     | d      | nd     | nd     | nd     | nd     | nd     | nd     |
| peptide transporter ptr2                                          | 385302422             | 2                                         | nd       | nd     | nd     | nd     | nd     | d      | nd     | d      | nd     | nd     | nd     |
| casein kinase II subunit alpha                                    | 385302593             | 1                                         | nd       | nd     | nd     | nd     | nd     | nd     | nd     | d      | nd     | nd     | nd     |
| serine threonine protein                                          | 385301353             | 4                                         | d        | nd     | d      | nd     | nd     | nd     | nd     | d      | nd     | nd     | d      |
| phenylalanyl-tRNA synthetase beta chain                           | 385304531             | 1                                         | nd       | nd     | nd     | nd     | nd     | nd     | nd     | nd     | d      | nd     | nd     |
| ymr074c-like protein                                              | 385303275             | 1                                         | nd       | nd     | nd     | nd     | d      | nd     | nd     | nd     | nd     | nd     | nd     |
| global transcription activator swi1p                              | 385301515             | 1                                         | nd       | nd     | nd     | nd     | nd     | nd     | d      | nd     | nd     | nd     | nd     |
| yml030w-like protein                                              | 385302432             | 1                                         | nd       | nd     | nd     | nd     | nd     | nd     | d      | nd     | nd     | nd     | nd     |
| putative fe 2-oxoglutarate-dependent dioxygenase                  | 385305843             | 1                                         | nd       | nd     | nd     | nd     | nd     | nd     | nd     | nd     | nd     | nd     | d      |
| oligosaccharyl transferase stt3 subunit                           | 385303141             | 1                                         | nd       | nd     | nd     | nd     | nd     | nd     | nd     | d      | nd     | nd     | nd     |
| aminophospholipid translocase                                     | 385301318             | 1                                         | nd       | nd     | nd     | nd     | nd     | nd     | nd     | nd     | d      | nd     | nd     |
| hypothetical protein AWRI1499_1061                                | 385304938             | 1                                         | nd       | nd     | nd     | d      | nd     | nd     | nd     | nd     | nd     | nd     | nd     |
| smad anchor for receptor activation                               | 385305917             | 1                                         | nd       | nd     | nd     | nd     | nd     | nd     | nd     | d      | nd     | nd     | nd     |
| sulfite reductase beta subunit                                    | 385302908             | 1                                         | nd       | nd     | nd     | nd     | nd     | nd     | d      | nd     | nd     | nd     | nd     |
| hypothetical protein AWRI1499_2593                                | 385303473             | 1                                         | nd       | nd     | nd     | nd     | nd     | d      | nd     | nd     | nd     | nd     | nd     |
| rad53p                                                            | 385301235             | 1                                         | nd       | nd     | d      | nd     | nd     | nd     | nd     | nd     | nd     | nd     | nd     |
| noc3p                                                             | 385301439             | 1                                         | nd       | nd     | d      | nd     | nd     | nd     | nd     | nd     | nd     | nd     | nd     |
| origin recognition complex subunit 2                              | 385305286             | 1                                         | nd       | nd     | nd     | nd     | nd     | nd     | nd     | nd     | d      | nd     | nd     |
| putative ion transporter                                          | 385302480             | 1                                         | nd       | nd     | nd     | nd     | d      | nd     | nd     | nd     | nd     | nd     | nd     |
| peptidyl-prolyl cis-trans isomerase cyp7                          | 385303432             | 2                                         | nd       | nd     | nd     | nd     | nd     | nd     | nd     | nd     | nd     | d      | d      |
| protein interacting with poly -binding protein pab1p              | 385304979             | 2                                         | nd       | nd     | nd     | nd     | d      | d      | nd     | nd     | nd     | nd     | nd     |
| heat shock protein 70                                             | 385305238             | 9                                         | d        | d      | d      | d      | d      | nd     | d      | nd     | d      | d      | d      |
| alpha subunit of the f1 sector of mitochondrial f1f0 ATP synthase | 385302679             | 2                                         | nd       | nd     | nd     | d      | nd     | d      | nd     | nd     | nd     | nd     | nd     |
| hypothetical protein AWRI1499_4825                                | 385301084             | 1                                         | d        | nd     | nd     | nd     | nd     | nd     | nd     | nd     | nd     | nd     | nd     |
| nuclear pore complex subunit                                      | 385301760             | 1                                         | nd       | nd     | nd     | nd     | nd     | nd     | nd     | d      | nd     | nd     | nd     |

# Supplemental Data for:

Križanović S, Gracin L, Cindrić M, Tomašević M, Kelšin K, Lukić K and Kovačević Ganić K.

Comparison of proteomic, metabolic, and growth profiles of *Brettanomyces bruxellensis* isolates from Croatian wines.

Am J Enol Vitic 70:77-87. doi: 10.5344/ajev.2018.18025

**Supplemental Table 2 (continued)** List of proteins expressed in the tested *Brettanomyces bruxellensis* isolates and the reference strain.

| Protein name                                                              | NCBI accession number | No. of tested isolates expressing protein | Isolate  |        |        |        |        |        |        |        |        |        |        |
|---------------------------------------------------------------------------|-----------------------|-------------------------------------------|----------|--------|--------|--------|--------|--------|--------|--------|--------|--------|--------|
|                                                                           |                       |                                           | CBS 2499 | KLV 11 | KLV 13 | KLV 14 | KLV 15 | KLV 16 | KLV 17 | KLV 18 | KLV 19 | KLV 21 | KLV 22 |
| peptidyl-prolyl cis-trans isomerase of the endoplasmic reticulum          | 385300980             | 1                                         | nd       | nd     | nd     | nd     | nd     | nd     | d      | nd     | nd     | nd     | nd     |
| methionine synthase                                                       | 385305389             | 4                                         | d        | nd     | d      | nd     | d      | nd     | d      | nd     | nd     | nd     | nd     |
| hypothetical protein AWRI1499_1742                                        | 385304305             | 1                                         | nd       | nd     | nd     | nd     | nd     | nd     | nd     | d      | nd     | nd     | nd     |
| leucyl-tRNA synthetase                                                    | 385302897             | 1                                         | nd       | nd     | nd     | nd     | nd     | nd     | nd     | nd     | nd     | d      | nd     |
| respiratory growth induced protein 1                                      | 385304459             | 1                                         | nd       | nd     | nd     | nd     | nd     | d      | nd     | nd     | nd     | nd     | nd     |
| mRNA cleavage and polyadenylation specificity factor complex subunit ysh1 | 385305954             | 1                                         | nd       | nd     | nd     | nd     | nd     | nd     | nd     | d      | nd     | nd     | nd     |
| mitotic exit network forms GTPase-activating bfa1p-bub2p complex          | 385305446             | 3                                         | d        | nd     | nd     | nd     | nd     | nd     | nd     | d      | d      | nd     | nd     |
| hypothetical protein AWRI1499_3540                                        | 385302448             | 1                                         | nd       | nd     | nd     | nd     | d      | nd     | nd     | nd     | nd     | nd     | nd     |
| phosphofructokinase beta-subunit                                          | 385304848             | 1                                         | nd       | nd     | nd     | nd     | nd     | nd     | nd     | nd     | d      | nd     | nd     |
| protein puf6                                                              | 385302417             | 1                                         | nd       | d      | nd     | nd     | nd     | nd     | nd     | nd     | nd     | nd     | nd     |
| mitochondrial DNA replication protein rad52p                              | 385302098             | 1                                         | nd       | nd     | nd     | nd     | nd     | nd     | nd     | nd     | d      | nd     | nd     |
| rad52p                                                                    | 385305692             | 1                                         | nd       | nd     | nd     | nd     | nd     | nd     | d      | nd     | nd     | nd     | nd     |
| protein sur2                                                              | 385303837             | 1                                         | d        | nd     | nd     | nd     | nd     | nd     | nd     | nd     | nd     | nd     | nd     |
| formin binding protein                                                    | 385302467             | 1                                         | nd       | nd     | nd     | d      | nd     | nd     | nd     | nd     | nd     | nd     | nd     |
| coproporphyrinogen III oxidase                                            | 385304500             | 3                                         | nd       | nd     | nd     | nd     | d      | nd     | d      | d      | nd     | nd     | nd     |
| membrane protein                                                          | 385302008             | 3                                         | nd       | d      | nd     | nd     | nd     | nd     | d      | nd     | d      | nd     | nd     |
| aspartic beta semi-aldehyde dehydrogenase                                 | 385303361             | 1                                         | nd       | nd     | nd     | nd     | d      | nd     | nd     | nd     | nd     | nd     | nd     |
| n-linked glycosylation-like protein                                       | 385302528             | 1                                         | nd       | nd     | nd     | nd     | nd     | d      | nd     | nd     | nd     | nd     | nd     |
| 40s ribosomal protein s2                                                  | 385302511             | 2                                         | nd       | d      | nd     | nd     | nd     | nd     | nd     | d      | nd     | nd     | nd     |
| putative hsf-type DNA binding transcription factor                        | 385305587             | 1                                         | nd       | nd     | nd     | nd     | nd     | nd     | d      | nd     | nd     | nd     | nd     |
| acetyl- carboxylase                                                       | 385302073             | 1                                         | nd       | nd     | nd     | nd     | nd     | nd     | nd     | d      | nd     | nd     | nd     |
| hypothetical protein AWRI1499_4858                                        | 385301039             | 2                                         | nd       | nd     | d      | nd     | nd     | nd     | nd     | d      | nd     | nd     | nd     |
| scaffold protein scd2                                                     | 385302120             | 1                                         | nd       | nd     | nd     | nd     | nd     | d      | nd     | nd     | nd     | nd     | nd     |
| vacuolar import and degradation protein 28                                | 385303755             | 1                                         | nd       | nd     | d      | nd     | nd     | nd     | nd     | nd     | nd     | nd     | nd     |
| proteasome activator subunit                                              | 385303651             | 1                                         | nd       | nd     | nd     | nd     | nd     | nd     | nd     | d      | nd     | nd     | nd     |
| ribosome biogenesis protein bms1                                          | 385304716             | 1                                         | nd       | nd     | nd     | nd     | nd     | nd     | nd     | nd     | nd     | d      | nd     |
| ras-related c3 botulinum toxin substrate 1 precursor                      | 385302979             | 1                                         | nd       | nd     | nd     | nd     | nd     | nd     | nd     | nd     | d      | nd     | nd     |
| acetolactate mitochondrial precursor                                      | 385301363             | 1                                         | nd       | nd     | nd     | d      | nd     | nd     | nd     | nd     | nd     | nd     | nd     |
| ca2+-transporting p-type ATPase                                           | 385305363             | 1                                         | d        | nd     | nd     | nd     | nd     | nd     | nd     | nd     | nd     | nd     | nd     |
| 3-hydroxyisobutyryl- hydrolase                                            | 385301900             | 1                                         | nd       | nd     | nd     | d      | nd     | nd     | nd     | nd     | nd     | nd     | nd     |
| transcription elongation factor s-II                                      | 385304648             | 1                                         | nd       | nd     | nd     | nd     | nd     | nd     | nd     | nd     | nd     | d      | nd     |
| hypothetical protein AWRI1499_3080                                        | 385302926             | 2                                         | nd       | nd     | nd     | nd     | nd     | d      | nd     | d      | nd     | nd     | nd     |
| u4 tri-snrrp-associated protein 1                                         | 385302374             | 2                                         | nd       | d      | d      | nd     | nd     | nd     | nd     | nd     | nd     | nd     | nd     |
| yjr096w-like protein                                                      | 385303084             | 1                                         | nd       | nd     | nd     | nd     | d      | nd     | nd     | nd     | nd     | nd     | nd     |
| 60s ribosomal protein l18                                                 | 385303328             | 2                                         | nd       | d      | nd     | nd     | d      | nd     | nd     | nd     | nd     | nd     | nd     |
| putative DNA binding component of sbf                                     | 385304406             | 3                                         | nd       | d      | nd     | nd     | d      | nd     | nd     | nd     | nd     | nd     | d      |
| suppressor of kinetochore protein 1                                       | 385302859             | 2                                         | d        | nd     | nd     | nd     | nd     | nd     | d      | nd     | nd     | nd     | nd     |
| cytochrome p450                                                           | 385302907             | 1                                         | nd       | nd     | nd     | nd     | nd     | nd     | nd     | nd     | nd     | d      | nd     |
| hypothetical protein AWRI1499_1942                                        | 385304095             | 1                                         | d        | nd     | nd     | nd     | nd     | nd     | nd     | nd     | nd     | nd     | nd     |
| transporter mitochondrial precursor                                       | 385301033             | 1                                         | nd       | d      | nd     | nd     | nd     | nd     | nd     | nd     | nd     | nd     | nd     |
| succinate-semialdehyde dehydrogenase                                      | 385303233             | 1                                         | nd       | d      | nd     | nd     | nd     | nd     | nd     | nd     | nd     | nd     | nd     |
| hydroxymethylglutaryl- synthase                                           | 385304587             | 2                                         | nd       | d      | nd     | nd     | nd     | nd     | nd     | nd     | nd     | d      | nd     |
| mitochondrial forms a heterodimer complex with mss1p                      | 385302452             | 1                                         | nd       | nd     | nd     | nd     | nd     | nd     | d      | nd     | nd     | nd     | nd     |

# Supplemental Data for:

Križanović S, Gracin L, Cindrić M, Tomašević M, Kelšin K, Lukić K and Kovačević Ganić K.

Comparison of proteomic, metabolic, and growth profiles of *Brettanomyces bruxellensis* isolates from Croatian wines.

Am J Enol Vitic 70:77-87. doi: 10.5344/ajev.2018.18025

**Supplemental Table 2 (continued)** List of proteins expressed in the tested *Brettanomyces bruxellensis* isolates and the reference strain.

| Protein name                                                                | NCBI accession number | No. of tested isolates expressing protein | Isolate  |        |        |        |        |        |        |        |        |        |        |
|-----------------------------------------------------------------------------|-----------------------|-------------------------------------------|----------|--------|--------|--------|--------|--------|--------|--------|--------|--------|--------|
|                                                                             |                       |                                           | CBS 2499 | KLV 11 | KLV 13 | KLV 14 | KLV 15 | KLV 16 | KLV 17 | KLV 18 | KLV 19 | KLV 21 | KLV 22 |
| carboxypeptidase b-like processing protease                                 | 385305138             | 1                                         | nd       | nd     | nd     | nd     | nd     | nd     | nd     | nd     | nd     | d      | nd     |
| calnexin                                                                    | 385302587             | 1                                         | nd       | nd     | nd     | nd     | nd     | nd     | nd     | nd     | d      | nd     | nd     |
| 40s ribosomal protein s11                                                   | 385301869             | 1                                         | nd       | nd     | nd     | d      | nd     | nd     | nd     | nd     | nd     | nd     | nd     |
| DNA repair protein                                                          | 385302998             | 1                                         | nd       | d      | nd     | nd     | nd     | nd     | nd     | nd     | nd     | nd     | nd     |
| 60s ribosomal                                                               | 385302196             | 7                                         | d        | d      | d      | d      | d      | d      | d      | nd     | nd     | nd     | nd     |
| beta alanine synthase                                                       | 385304274             | 1                                         | nd       | nd     | nd     | d      | nd     | nd     | nd     | nd     | nd     | nd     | nd     |
| hypothetical protein AWRI1499_4868                                          | 385301024             | 1                                         | nd       | nd     | nd     | nd     | d      | nd     | nd     | nd     | nd     | nd     | nd     |
| coatome alpha subunit                                                       | 385302626             | 1                                         | nd       | nd     | nd     | nd     | nd     | d      | nd     | nd     | nd     | nd     | nd     |
| cysteine synthase                                                           | 385304873             | 6                                         | nd       | d      | d      | d      | nd     | nd     | d      | nd     | d      | d      | nd     |
| fun19p                                                                      | 385305842             | 1                                         | nd       | nd     | nd     | nd     | d      | nd     | nd     | nd     | nd     | nd     | nd     |
| alpha-aminoadipate reductase                                                | 385302322             | 2                                         | d        | nd     | nd     | nd     | nd     | d      | nd     | nd     | nd     | nd     | nd     |
| protein sof1                                                                | 385305370             | 1                                         | d        | nd     | nd     | nd     | nd     | nd     | nd     | nd     | nd     | nd     | nd     |
| serine threonine protein kinase                                             | 385305608             | 2                                         | nd       | nd     | nd     | d      | nd     | nd     | nd     | d      | nd     | nd     | nd     |
| cell cycle control protein                                                  | 385301884             | 1                                         | nd       | d      | nd     | nd     | nd     | nd     | nd     | nd     | nd     | nd     | nd     |
| RNA polymerase III c11 subunit                                              | 385305484             | 1                                         | nd       | nd     | nd     | d      | nd     | nd     | nd     | nd     | nd     | nd     | nd     |
| mitochondrial import inner membrane translocase subunit tim10               | 385304644             | 1                                         | nd       | nd     | nd     | nd     | nd     | nd     | nd     | nd     | nd     | d      | nd     |
| 60s ribosomal protein l3                                                    | 385305996             | 11                                        | d        | d      | d      | d      | d      | d      | d      | d      | d      | d      | d      |
| amphiphysin-like lipid raft protein                                         | 385304243             | 1                                         | nd       | nd     | nd     | nd     | nd     | nd     | d      | nd     | nd     | nd     | nd     |
| hypothetical protein AWRI1499_3690                                          | 385302241             | 1                                         | d        | nd     | nd     | nd     | nd     | nd     | nd     | nd     | nd     | nd     | nd     |
| cell wall protein that contains a gpi-attachment site                       | 385306030             | 1                                         | d        | nd     | nd     | nd     | nd     | nd     | nd     | nd     | nd     | nd     | nd     |
| vacuolar ATP synthase subunit d                                             | 385305810             | 3                                         | nd       | nd     | d      | d      | nd     | nd     | nd     | d      | nd     | nd     | nd     |
| calcium ion transporter                                                     | 385301138             | 2                                         | nd       | nd     | d      | nd     | d      | nd     | nd     | nd     | nd     | nd     | nd     |
| GTP GDP exchange                                                            | 385301075             | 1                                         | nd       | d      | nd     | nd     | nd     | nd     | nd     | nd     | nd     | nd     | nd     |
| mitochondrial processing peptidase                                          | 385301173             | 2                                         | nd       | nd     | nd     | nd     | nd     | nd     | nd     | d      | nd     | nd     | d      |
| hypothetical protein AWRI1499_3377                                          | 385302643             | 2                                         | nd       | d      | nd     | nd     | nd     | nd     | d      | nd     | nd     | nd     | nd     |
| cysteinyI-tRNA synthetase                                                   | 385302349             | 1                                         | nd       | nd     | nd     | nd     | nd     | nd     | d      | nd     | nd     | nd     | nd     |
| aminophospholipid translocase phospholipid-transporting                     | 385304667             | 1                                         | nd       | nd     | nd     | nd     | d      | nd     | nd     | nd     | nd     | nd     | nd     |
| DNA-directed RNA polymerase i                                               | 385302821             | 1                                         | nd       | nd     | nd     | nd     | nd     | nd     | nd     | nd     | nd     | d      | nd     |
| yd124w-like protein                                                         | 385303429             | 1                                         | nd       | nd     | nd     | nd     | nd     | nd     | nd     | d      | nd     | nd     | nd     |
| C6 transcription factor (OTam)                                              | 385305487             | 1                                         | nd       | nd     | nd     | nd     | nd     | nd     | nd     | nd     | d      | nd     | nd     |
| actin-related protein                                                       | 385305800             | 1                                         | d        | nd     | nd     | nd     | nd     | nd     | nd     | nd     | nd     | nd     | nd     |
| hypothetical protein AWRI1499_3543                                          | 385302450             | 1                                         | nd       | nd     | nd     | d      | nd     | nd     | nd     | nd     | nd     | nd     | nd     |
| cytoskeletal adaptor protein                                                | 385301509             | 1                                         | nd       | nd     | nd     | nd     | nd     | nd     | nd     | nd     | nd     | d      | nd     |
| isoleucyl-tRNA synthetase                                                   | 385303334             | 5                                         | nd       | nd     | nd     | nd     | nd     | d      | d      | d      | nd     | d      | d      |
| putative zinc finger protein                                                | 385304950             | 1                                         | nd       | nd     | nd     | d      | nd     | nd     | nd     | nd     | nd     | nd     | nd     |
| hypothetical protein AWRI1499_3058                                          | 385302944             | 2                                         | nd       | nd     | nd     | nd     | nd     | nd     | nd     | d      | d      | nd     | nd     |
| protein phosphatases pp1 regulatory subunit sds22                           | 385302796             | 2                                         | nd       | nd     | nd     | nd     | nd     | d      | nd     | nd     | nd     | d      | nd     |
| hypothetical protein AWRI1499_0955                                          | 385305063             | 1                                         | nd       | nd     | nd     | nd     | nd     | nd     | nd     | nd     | d      | nd     | nd     |
| myosin i                                                                    | 385302458             | 1                                         | nd       | nd     | d      | nd     | nd     | nd     | nd     | nd     | nd     | nd     | nd     |
| u3 small nucleolar RNA-associated u3 snorhp                                 | 385305272             | 1                                         | nd       | nd     | nd     | nd     | nd     | nd     | nd     | nd     | nd     | d      | nd     |
| p-type ATPase sodium involved in na+ and li+ efflux to allow salt tolerance | 385301307             | 2                                         | nd       | nd     | nd     | nd     | nd     | nd     | d      | nd     | nd     | d      | nd     |
| hypothetical protein AWRI1499_4520                                          | 385301413             | 1                                         | nd       | nd     | nd     | nd     | nd     | nd     | nd     | nd     | d      | nd     | nd     |
| acyl-binding protein 2                                                      | 385303712             | 7                                         | d        | d      | d      | nd     | nd     | nd     | d      | d      | nd     | d      | d      |
| nucleolar GTP-binding protein 1                                             | 385305718             | 1                                         | nd       | d      | nd     | nd     | nd     | nd     | nd     | nd     | nd     | nd     | nd     |

# Supplemental Data for:

Križanović S, Gracin L, Cindrić M, Tomašević M, Kelšin K, Lukić K and Kovačević Ganić K.

Comparison of proteomic, metabolic, and growth profiles of *Brettanomyces bruxellensis* isolates from Croatian wines.

Am J Enol Vitic 70:77-87. doi: 10.5344/ajev.2018.18025

**Supplemental Table 2 (continued)** List of proteins expressed in the tested *Brettanomyces bruxellensis* isolates and the reference strain.

| Protein name                                                             | NCBI accession number | No. of tested isolates expressing protein | Isolate  |        |        |        |        |        |        |        |        |        |        |
|--------------------------------------------------------------------------|-----------------------|-------------------------------------------|----------|--------|--------|--------|--------|--------|--------|--------|--------|--------|--------|
|                                                                          |                       |                                           | CBS 2499 | KLV 11 | KLV 13 | KLV 14 | KLV 15 | KLV 16 | KLV 17 | KLV 18 | KLV 19 | KLV 21 | KLV 22 |
| guanyl-nucleotide exchange factor for the small g-protein sec4p          | 385305782             | 1                                         | nd       | nd     | nd     | nd     | nd     | nd     | nd     | d      | nd     | nd     | nd     |
| glyceraldehyde-3-phosphate dehydrogenase                                 | 385303430             | 11                                        | d        | d      | d      | d      | d      | d      | d      | d      | d      | d      | d      |
| peroxin 20                                                               | 385304295             | 1                                         | nd       | nd     | d      | nd     | nd     | nd     | nd     | nd     | nd     | nd     | nd     |
| putative ubiquitin ligase tom1p                                          | 385305727             | 2                                         | nd       | nd     | nd     | d      | nd     | nd     | nd     | nd     | nd     | d      | nd     |
| hypothetical protein AWRI1499_1400                                       | 385304666             | 1                                         | nd       | nd     | nd     | nd     | nd     | nd     | nd     | nd     | nd     | d      | nd     |
| anaphase-promoting complex subunit                                       | 385305889             | 3                                         | d        | nd     | nd     | nd     | nd     | nd     | d      | nd     | nd     | nd     | d      |
| cytoplasmic dynein heavy chain                                           | 385302084             | 1                                         | nd       | nd     | d      | nd     | nd     | nd     | nd     | nd     | nd     | nd     | nd     |
| u4 u6 small nuclear ribonucleoprotein prp4                               | 385301717             | 1                                         | nd       | nd     | nd     | nd     | nd     | d      | nd     | nd     | nd     | nd     | nd     |
| Imbr1-like conserved region containing protein                           | 385301752             | 2                                         | d        | d      | nd     | nd     | nd     | nd     | nd     | nd     | nd     | nd     | nd     |
| putative mRNA decapping enzyme dcp1p                                     | 385304189             | 2                                         | nd       | nd     | nd     | nd     | d      | nd     | nd     | nd     | d      | nd     | nd     |
| peroxisomal biogenesis factor 6                                          | 385303271             | 1                                         | nd       | nd     | nd     | nd     | d      | nd     | nd     | nd     | nd     | nd     | nd     |
| protein transport protein sec61 alpha subunit                            | 385302028             | 1                                         | nd       | nd     | d      | nd     | nd     | nd     | nd     | nd     | nd     | nd     | nd     |
| acidic ribosomal protein p2b                                             | 385302239             | 7                                         | d        | nd     | d      | d      | d      | d      | d      | d      | nd     | nd     | nd     |
| polyamine n-acetyl transferase                                           | 385305617             | 1                                         | nd       | d      | nd     | nd     | nd     | nd     | nd     | nd     | nd     | nd     | nd     |
| mitochondrial carrier protein                                            | 385303987             | 1                                         | nd       | nd     | nd     | nd     | nd     | d      | nd     | nd     | nd     | nd     | nd     |
| d-lactate dehydrogenase mitochondrial precursor                          | 385301336             | 1                                         | nd       | nd     | nd     | nd     | d      | nd     | nd     | nd     | nd     | nd     | nd     |
| putative autophagy-related wd40 domain protein atg18                     | 385302006             | 2                                         | nd       | nd     | nd     | nd     | nd     | d      | nd     | nd     | nd     | d      | nd     |
| phosphoglycerate kinase                                                  | 385303457             | 11                                        | d        | d      | d      | d      | d      | d      | d      | d      | d      | d      | d      |
| RNA-binding protein                                                      | 385306067             | 1                                         | d        | nd     | nd     | nd     | nd     | nd     | nd     | nd     | nd     | nd     | nd     |
| hypothetical protein AWRI1499_1739                                       | 385304302             | 3                                         | nd       | d      | nd     | nd     | d      | nd     | d      | nd     | nd     | nd     | nd     |
| putative ccr4-not complex associated factor caf130p                      | 385302711             | 1                                         | nd       | nd     | nd     | nd     | nd     | nd     | nd     | nd     | nd     | d      | nd     |
| protein that contains a phox homology domain and binds phosphoinositides | 385301768             | 1                                         | nd       | nd     | nd     | nd     | nd     | nd     | nd     | nd     | d      | nd     | nd     |
| lin1 family protein                                                      | 385302048             | 2                                         | nd       | nd     | nd     | nd     | nd     | d      | nd     | nd     | nd     | nd     | d      |
| hypothetical protein AWRI1499_2789                                       | 385303215             | 1                                         | nd       | nd     | nd     | nd     | nd     | nd     | d      | nd     | nd     | nd     | nd     |
| aldo keto reductase                                                      | 385304219             | 2                                         | nd       | nd     | nd     | nd     | nd     | nd     | nd     | nd     | d      | d      | nd     |
| DNA replication licensing factor                                         | 385305930             | 1                                         | nd       | nd     | nd     | nd     | nd     | nd     | nd     | nd     | nd     | d      | nd     |
| ykl215c-like protein                                                     | 385305252             | 1                                         | nd       | nd     | nd     | nd     | nd     | nd     | d      | nd     | nd     | nd     | nd     |
| suppressor protein stm1                                                  | 385303964             | 1                                         | nd       | nd     | d      | nd     | nd     | nd     | nd     | nd     | nd     | nd     | nd     |
| putative cytosolic ribosomal protein s24                                 | 385303569             | 11                                        | d        | d      | d      | d      | d      | d      | d      | d      | d      | d      | d      |
| putative mate family drug sodium antiporter                              | 385306086             | 1                                         | nd       | nd     | nd     | nd     | nd     | nd     | nd     | nd     | nd     | nd     | d      |
| alpha-mannosidase                                                        | 385302515             | 1                                         | nd       | nd     | nd     | nd     | nd     | d      | nd     | nd     | nd     | nd     | nd     |
| yer156c-like protein                                                     | 385305986             | 1                                         | nd       | nd     | d      | nd     | nd     | nd     | nd     | nd     | nd     | nd     | nd     |
| pre-mRNA splicing factor                                                 | 385304710             | 1                                         | nd       | nd     | nd     | nd     | nd     | nd     | nd     | d      | nd     | nd     | nd     |
| bud site selection                                                       | 385305317             | 1                                         | nd       | nd     | nd     | nd     | nd     | nd     | d      | nd     | nd     | nd     | nd     |
| prd1p                                                                    | 385301180             | 1                                         | nd       | nd     | nd     | nd     | d      | nd     | nd     | nd     | nd     | nd     | nd     |

d-detected; nd-not detected.

# Supplemental Data for:

Križanović S, Gracin L, Cindrić M, Tomašević M, Kelšin K, Lukić K and Kovačević Ganić K.

Comparison of proteomic, metabolic, and growth profiles of *Brettanomyces bruxellensis* isolates from Croatian wines.

Am J Enol Vitic 70:77-87. doi: 10.5344/ajev.2018.18025.

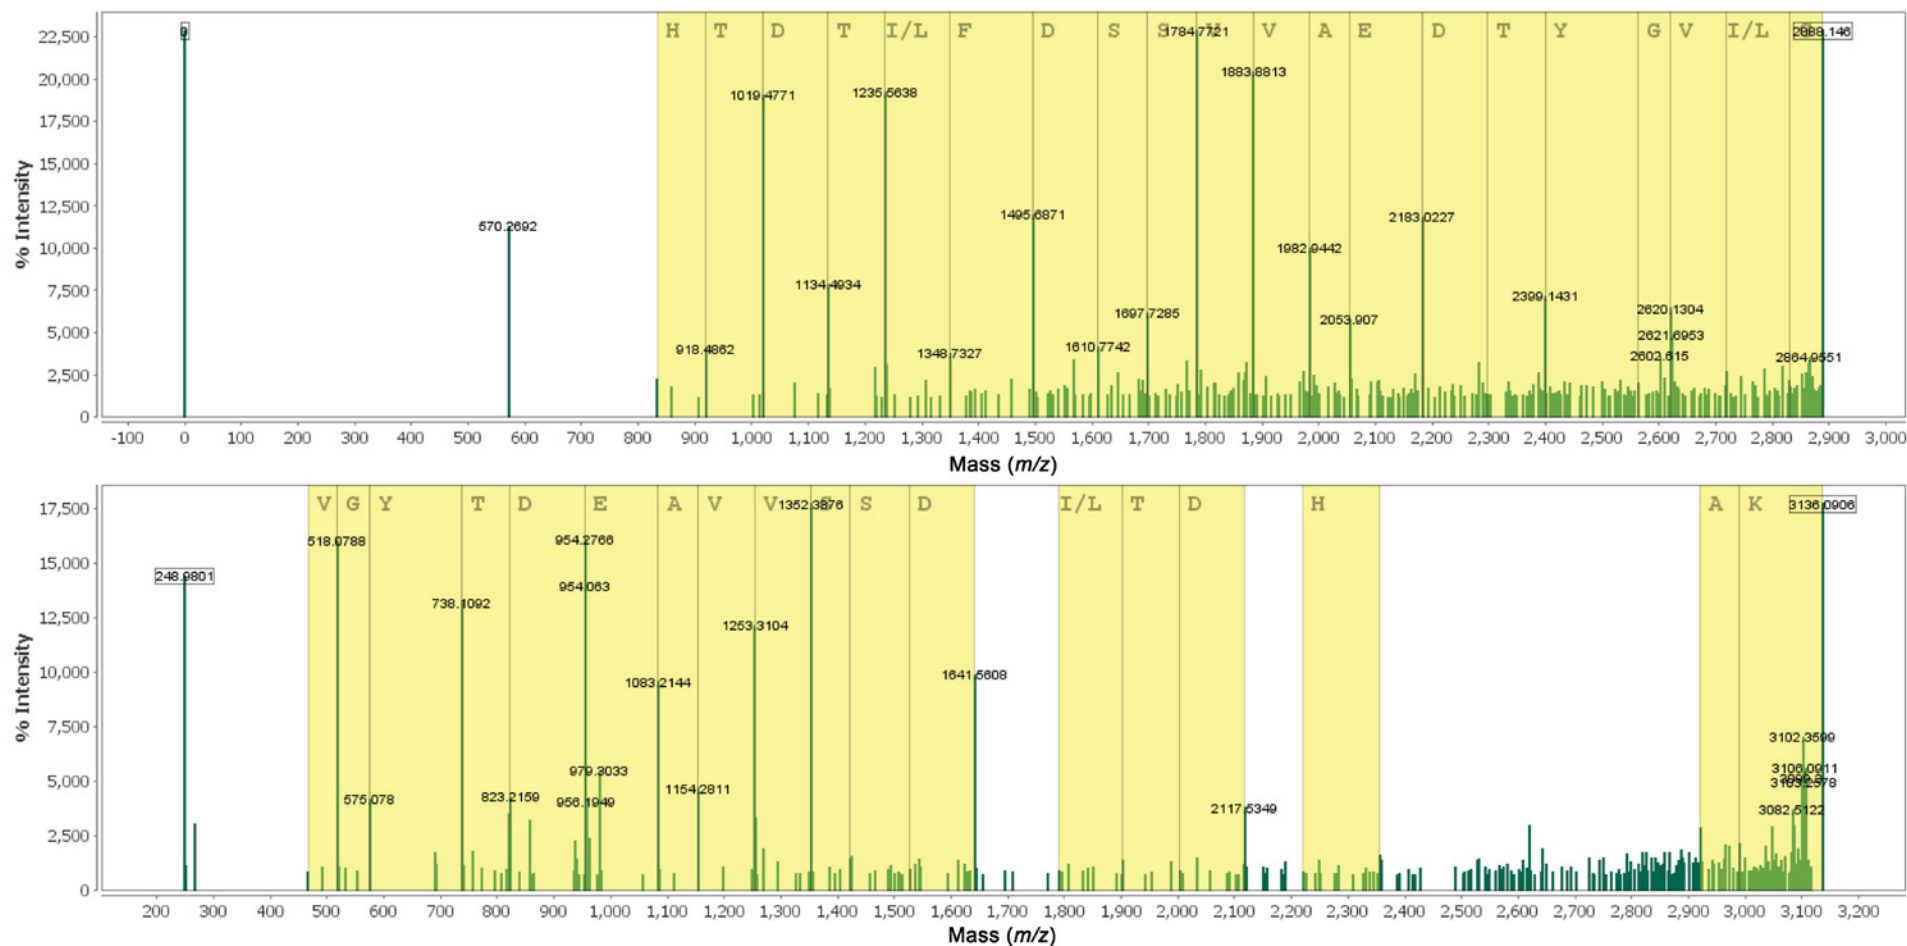

**Supplemental Figure 1** MALDI-MS-MS spectra of the GIVGYTDEAVVSSDFITDTHSTIFDAK peptide in positive (upper) and negative (lower) ion mode (peptide  $m/z$  3136.3286 in negative mass spectrometry (MS) of intact peptide after CAF-/CAF+ derivatization). The peptide was assigned according to the NCBI *nr* protein database for *Dekkera/Brettanomyces bruxellensis*. This figure has been added as a Microsoft PowerPoint file. In protein identification, only a perfect match was used for identification. A perfect match was achieved by positive- and negative-ion mode matching. Matching was achieved for a minimum of four amino acids in a row obtained in positive and negative MS-MS of the same peptide. 1.5% (12 proteins) of the total number of proteins were expressed in all data sets, which means that they could be used as biomarkers in *Dekkera/B. bruxellensis* yeast identification. Mismatch parameters are described in Butovac et al. (2016) and on the website <http://rapidcell.proteinreader.com/maldi-msms-biotypization-protocol/>.

## Supplemental Data for:

Križanović S, Gracin L, Cindrić M, Tomašević M, Kelšin K, Lukić K and Kovačević Ganić K.

Comparison of proteomic, metabolic, and growth profiles of *Brettanomyces bruxellensis* isolates from Croatian wines.

Am J Enol Vitic 70:77-87. doi: 10.5344/ajev.2018.18025.

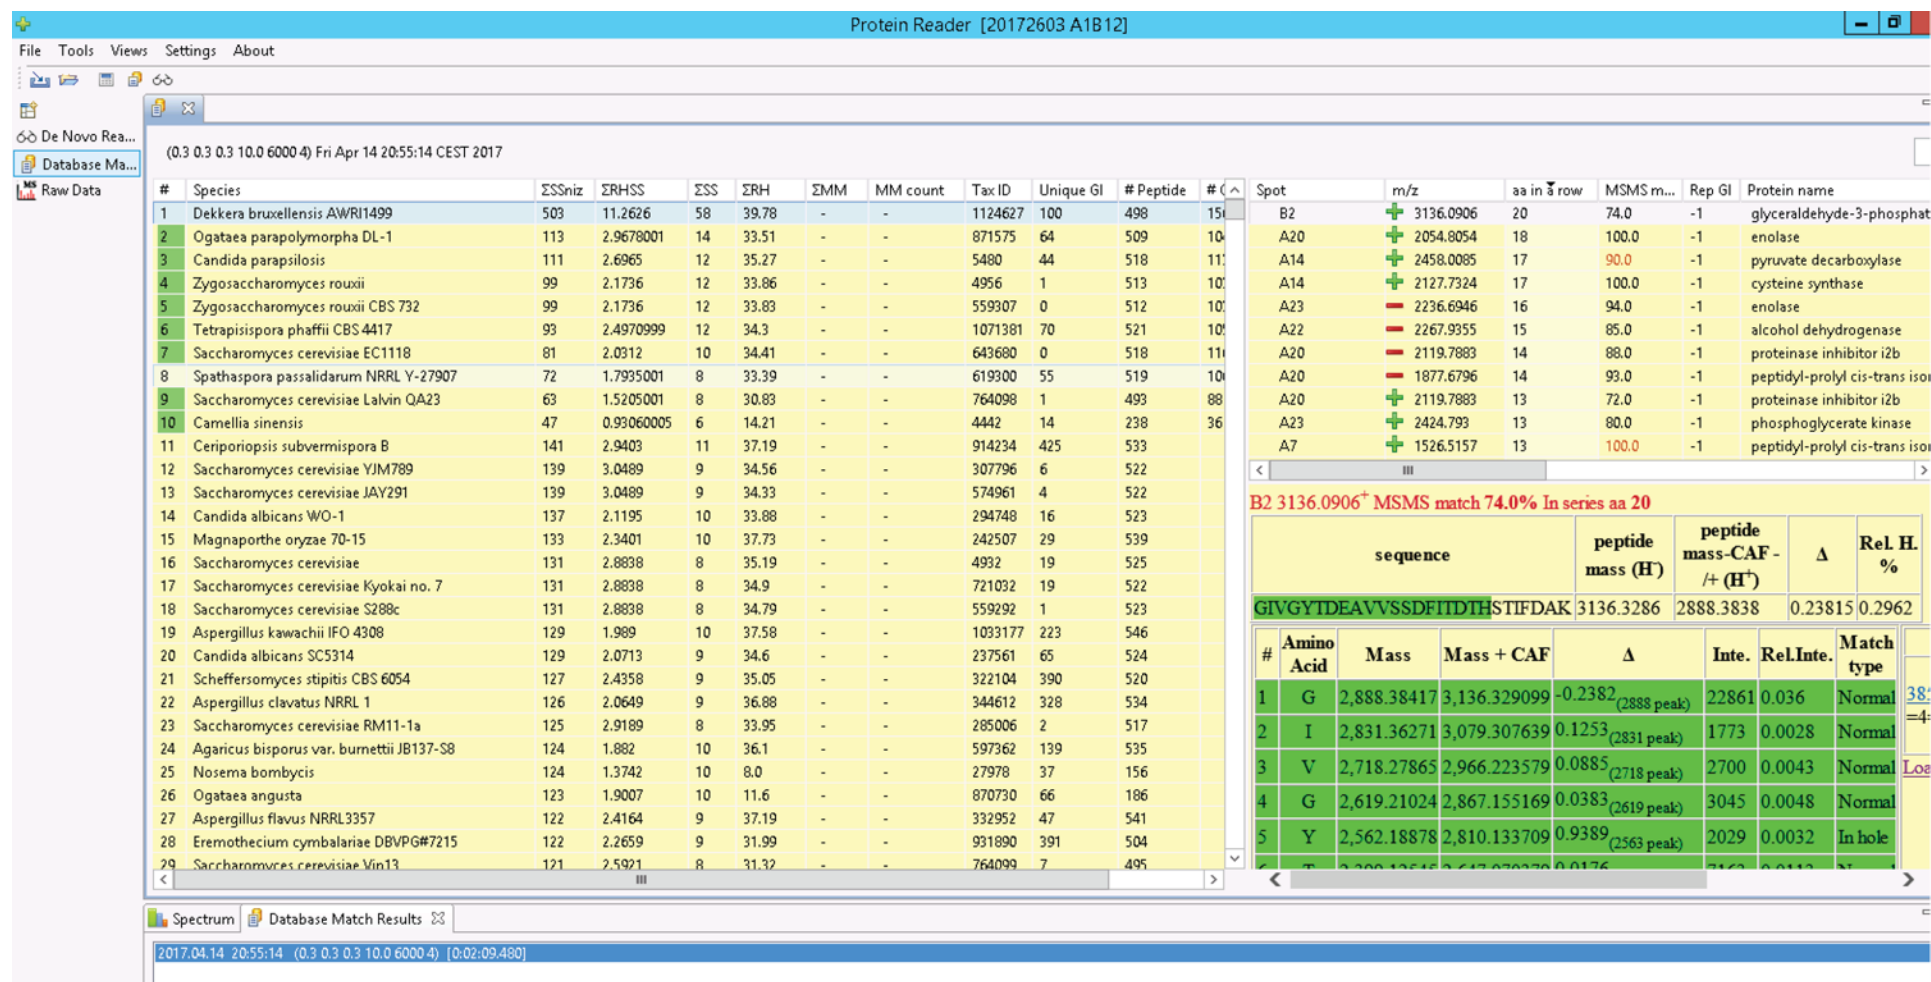

**Supplemental Figure 2** ProteinReader feature NCBI *nr* database match has been added as a Microsoft PowerPoint file. The CAF-/CAF+ method enables *de novo* sequencing of derivatized peptides with negative and positive-ion mode tandem mass spectrometry (MS-MS<sup>-</sup> and MS-MS<sup>+</sup>). Peptide sequences are read from MS-MS spectra and matched against those in the the entire NCBI *nr* database by a software named ProteinReader and confirmed by MS data of elucidated peptide mass sequences derived from the annotated genome. Matches for each peptide were sorted in the *Dekkera/Brettanomyces bruxellensis* subgroup of peptide hits.
